# Supplementary material for: An improved iron-mediated synthesis of N-2-aryl substituted 1,2,3-triazoles
Source: Royal Society of Chemistry journal article supplement (doi:10.1039/c3ra22485f), 2013-01-01
Supplement: c3ra22485f.pdf [file c3ra22485f.pdf]

## Supplementary Material

### **An Improved Iron-Mediated Synthesis of *N*-2-Aryl substituted 1,2,3-triazoles**

Ahmed Kamal\* and Ponnampalli Swapna

*Division of Organic Chemistry, Indian Institute of Chemical Technology, Hyderabad-500607,  
India*

ahmedkamal@iict.res.in

## $^1\text{H}$ and $^{13}\text{C}$ NMR spectra of the compounds (3a-s)

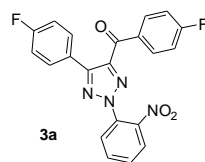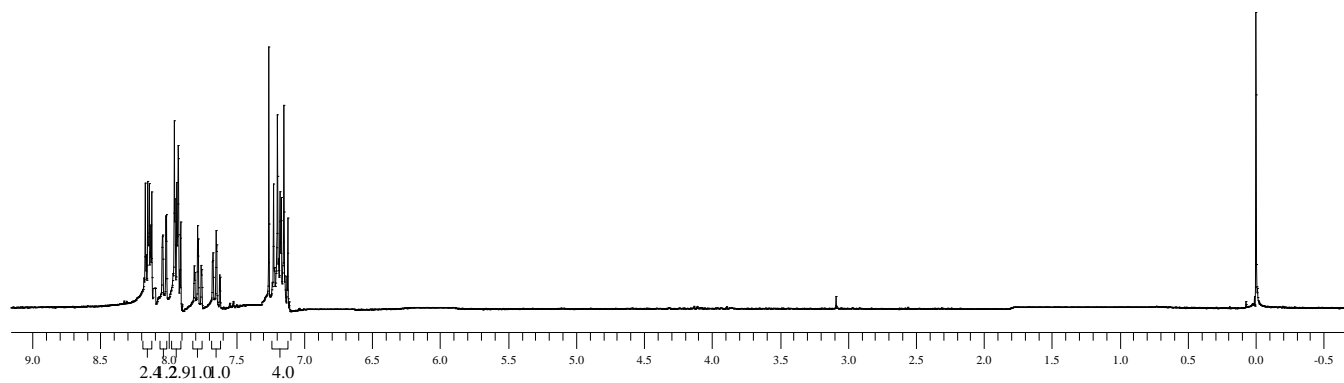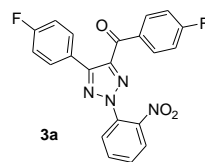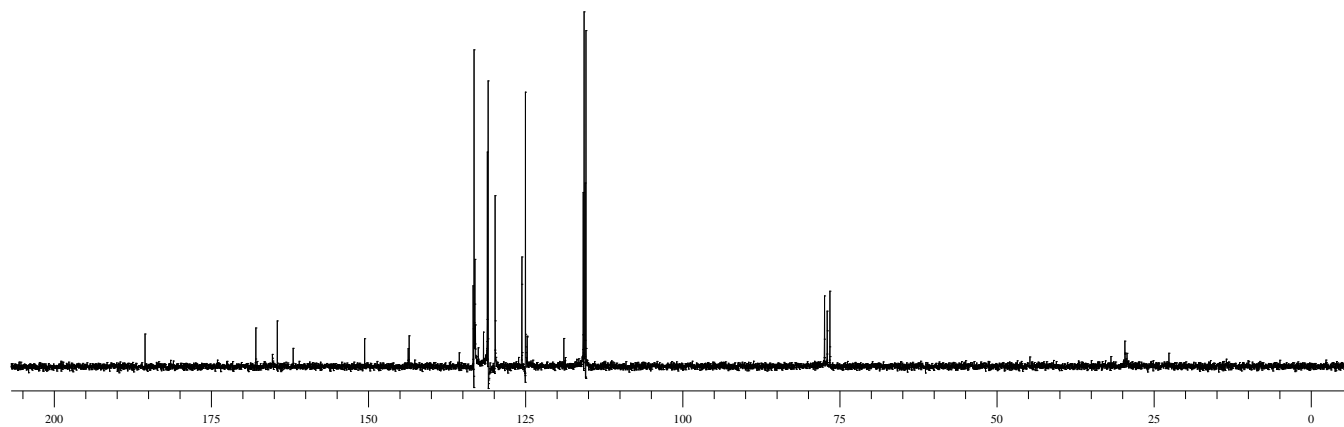

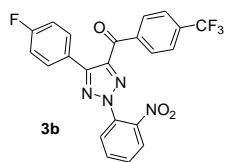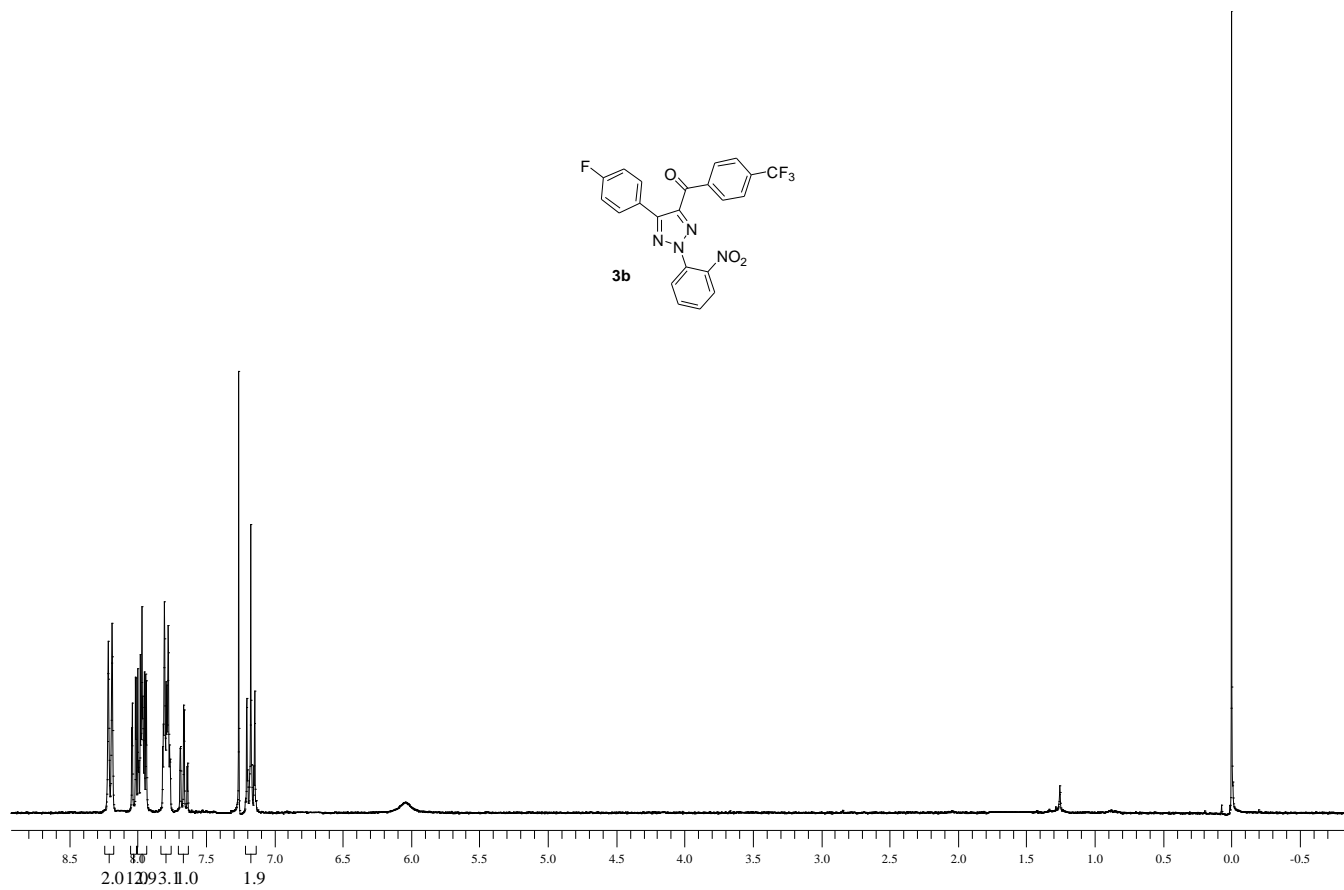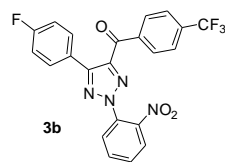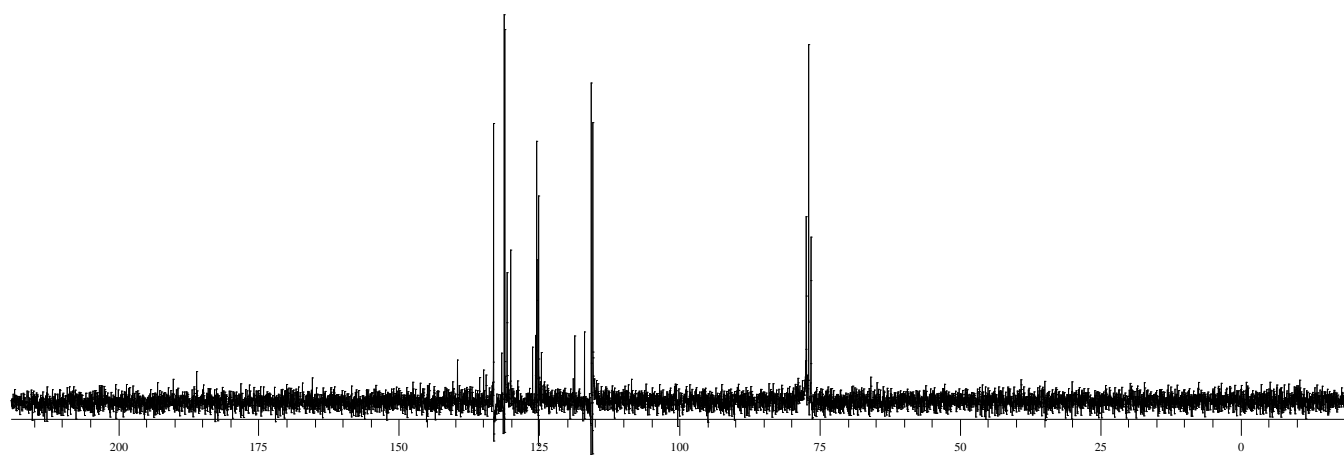

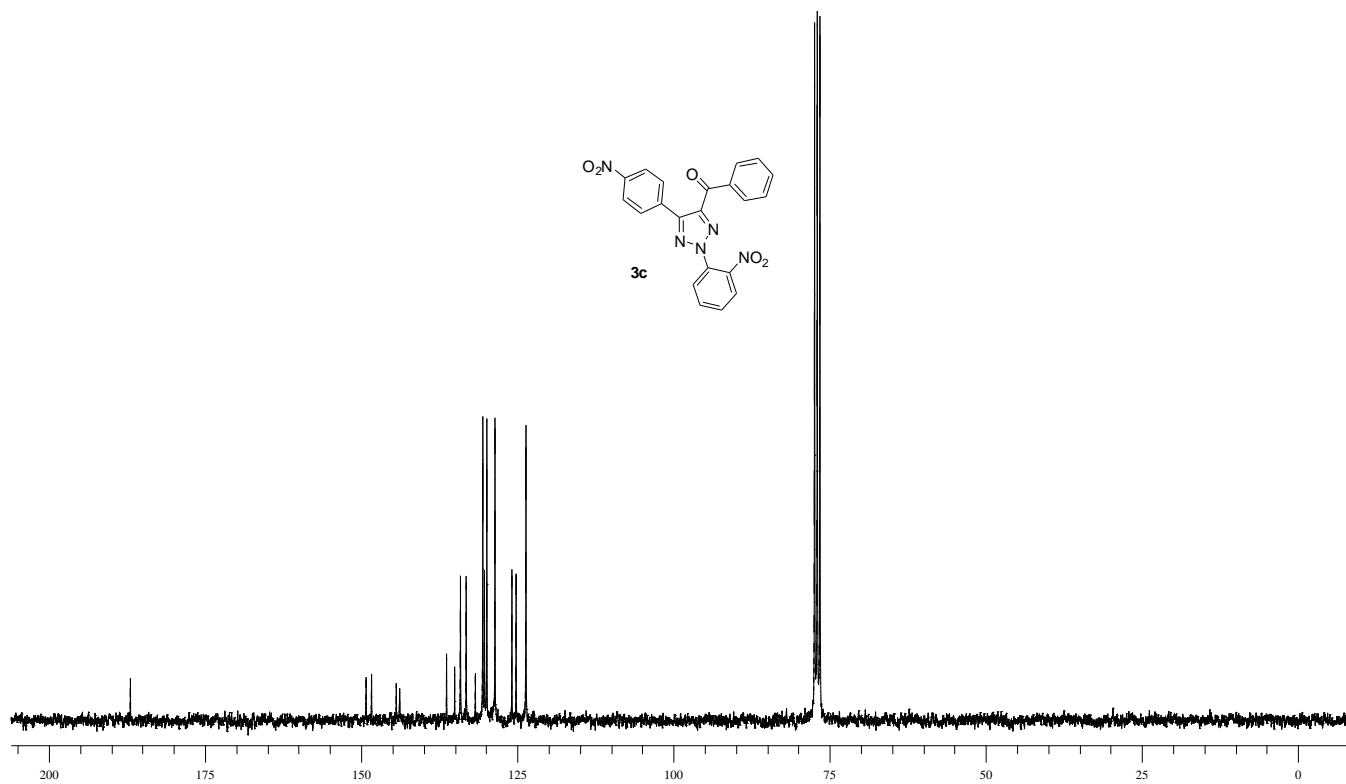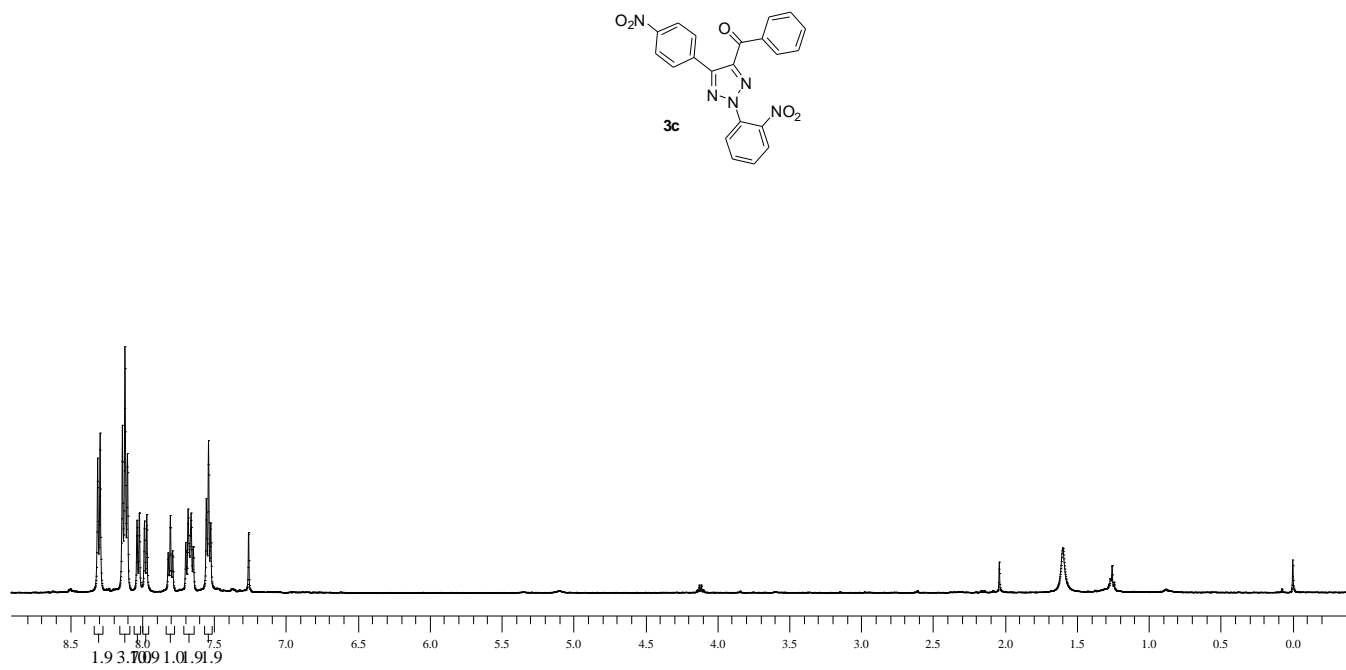

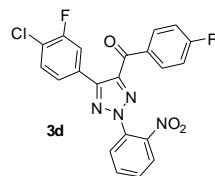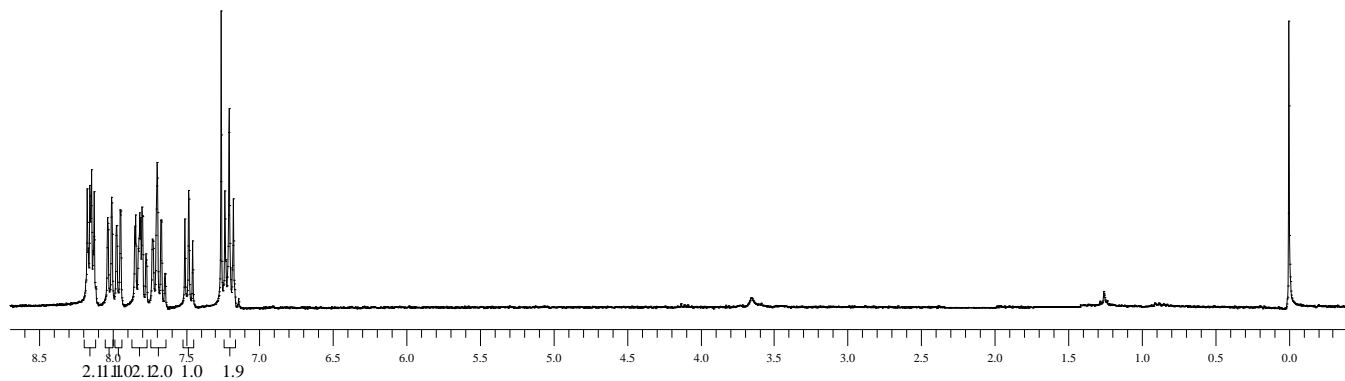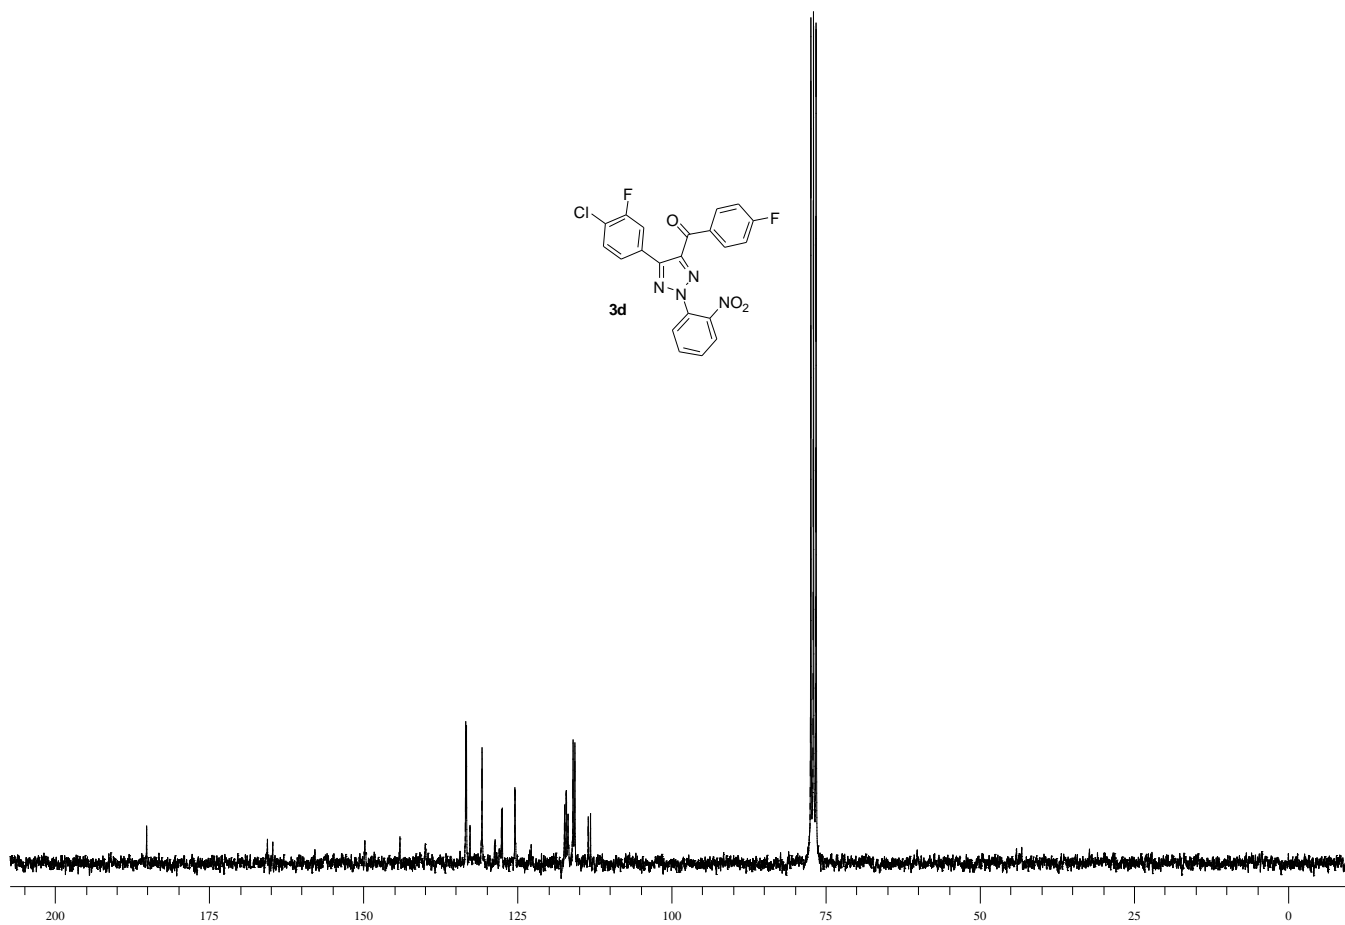

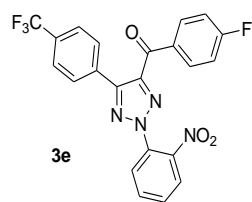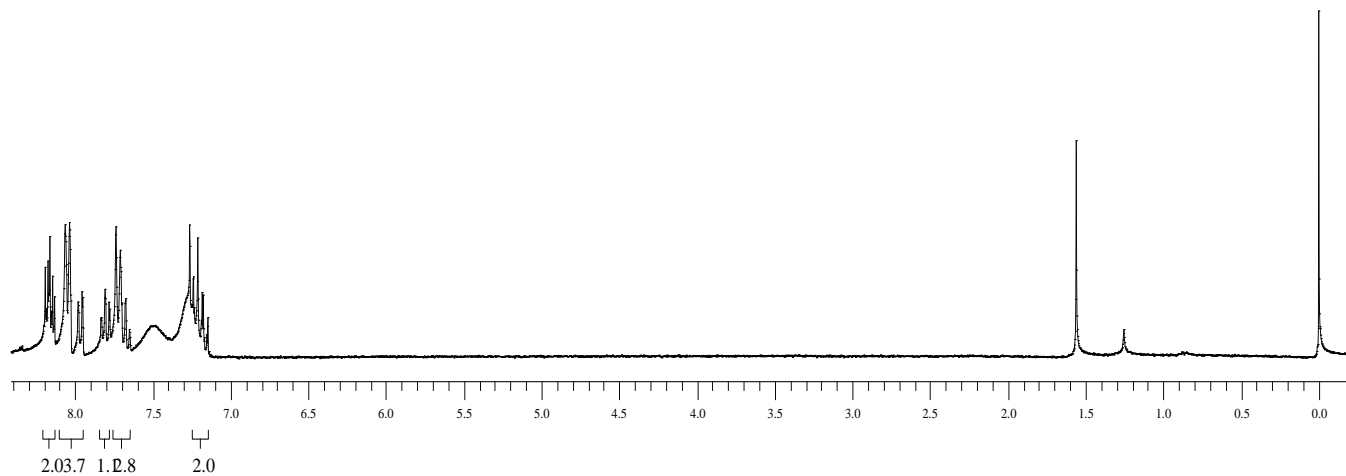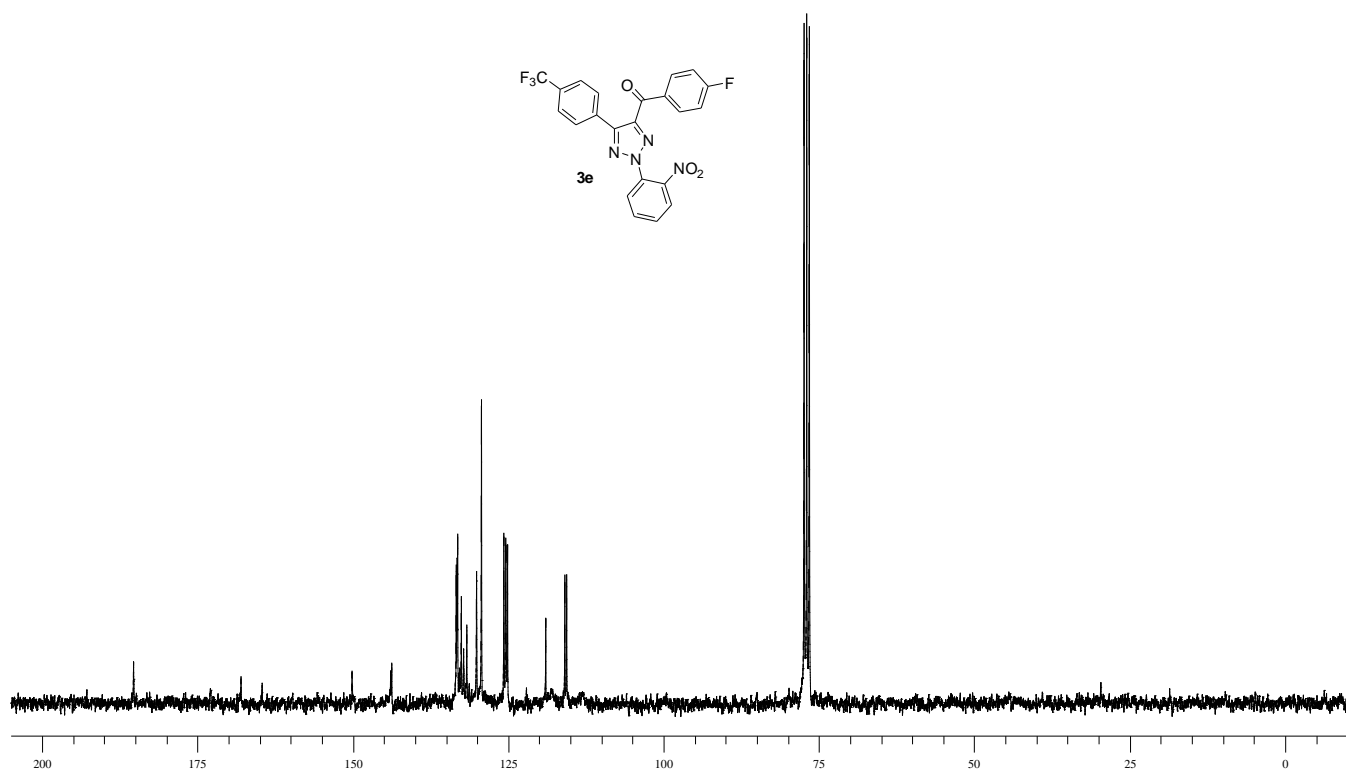

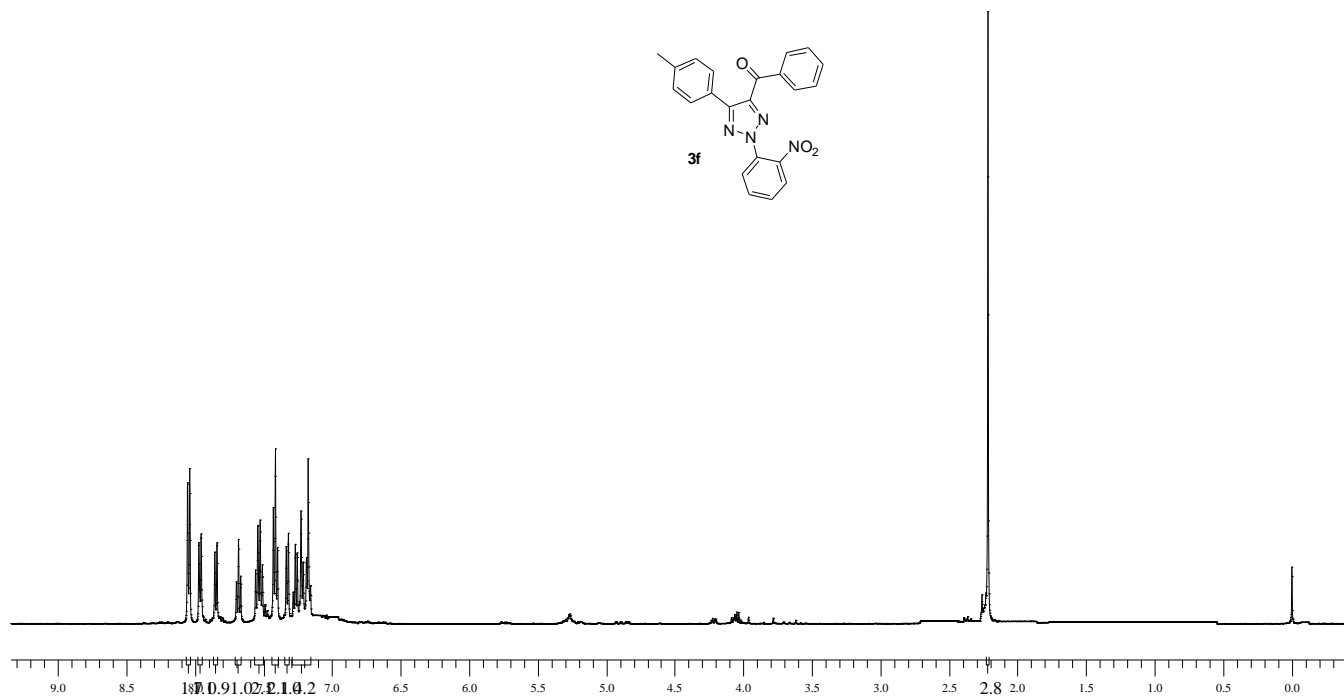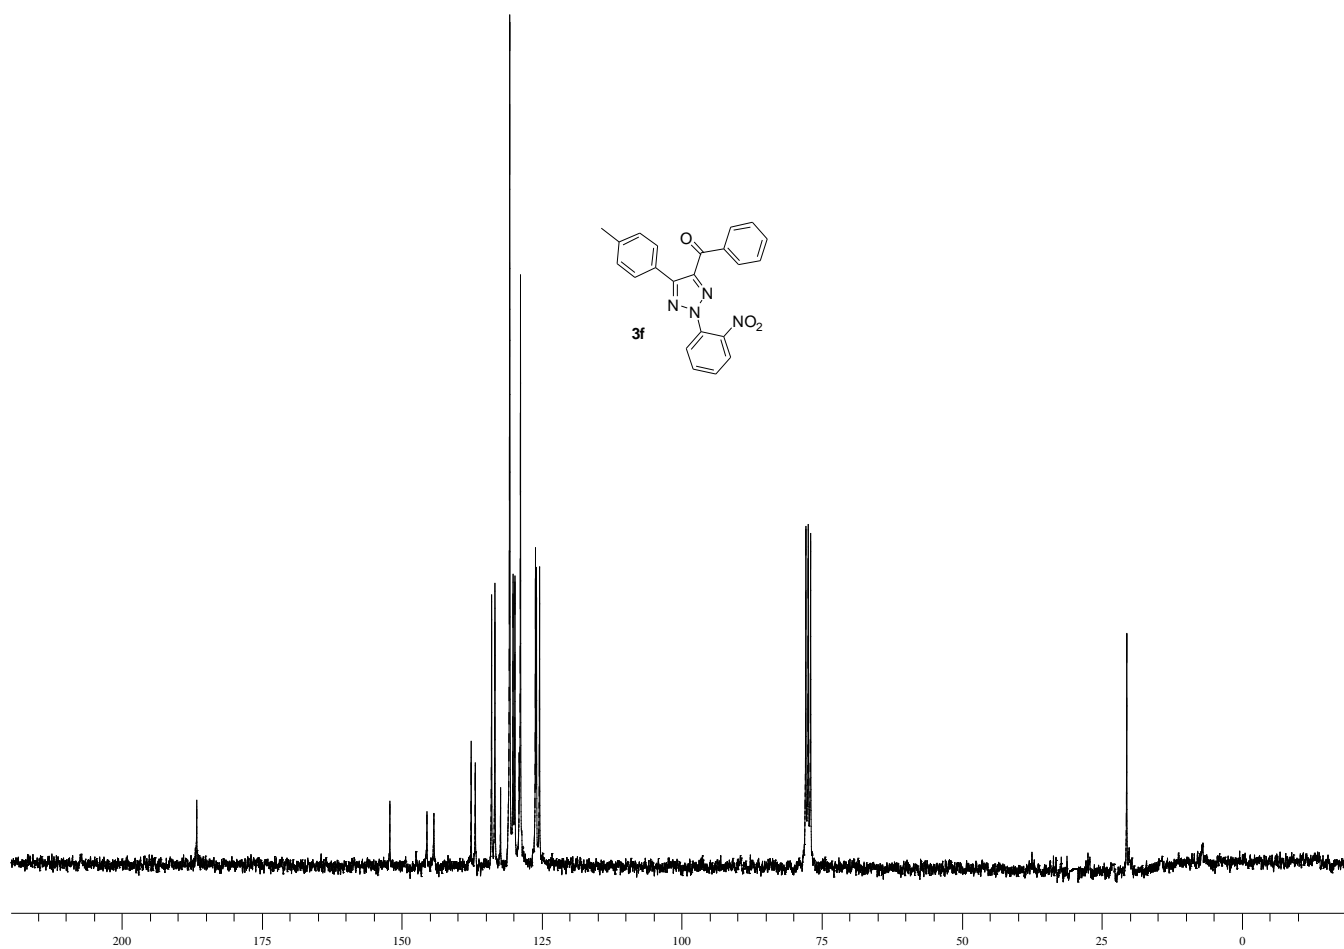

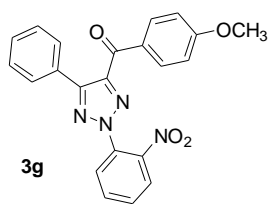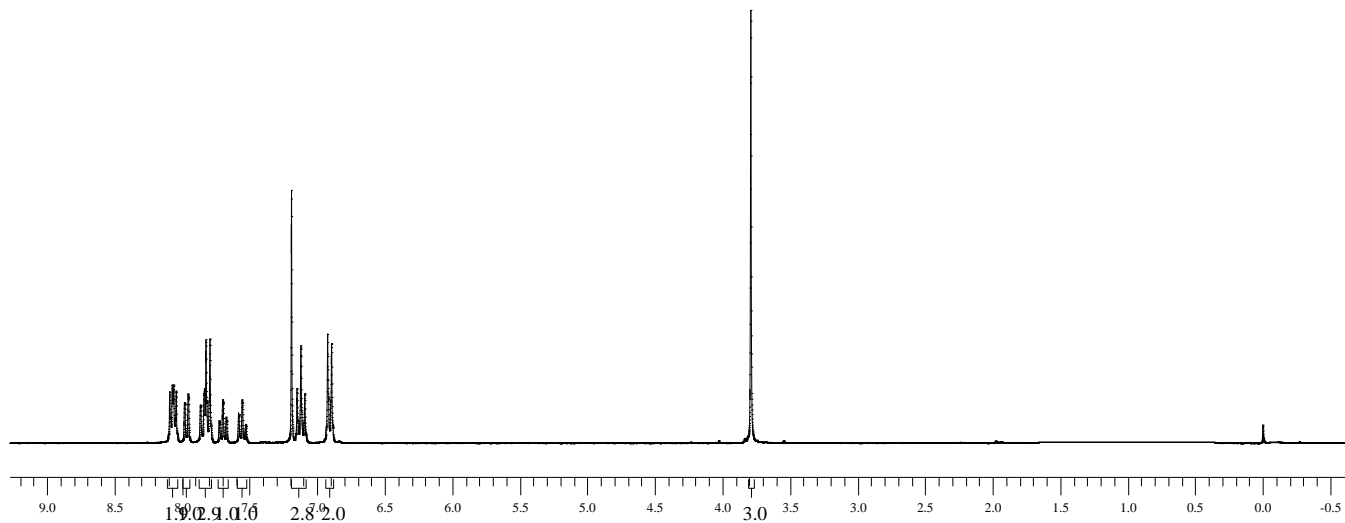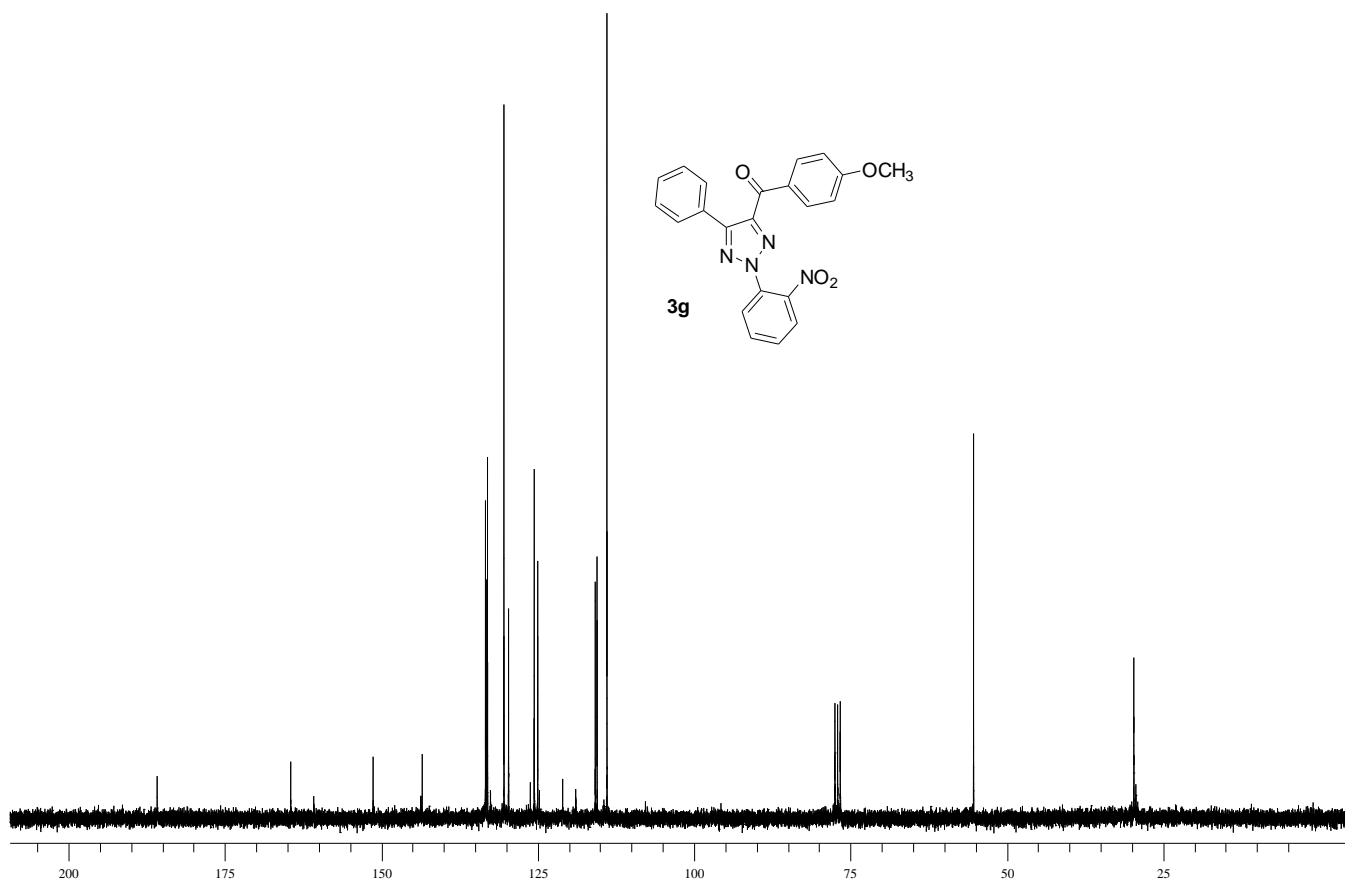



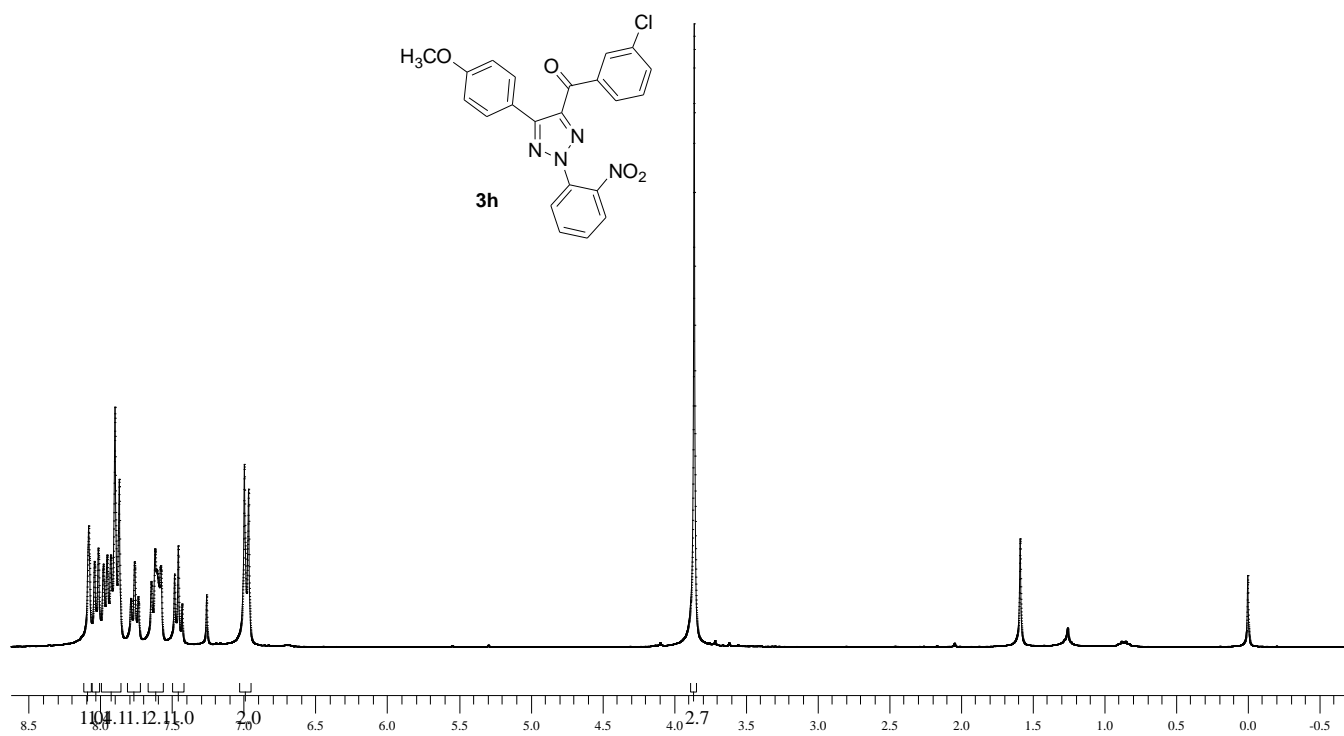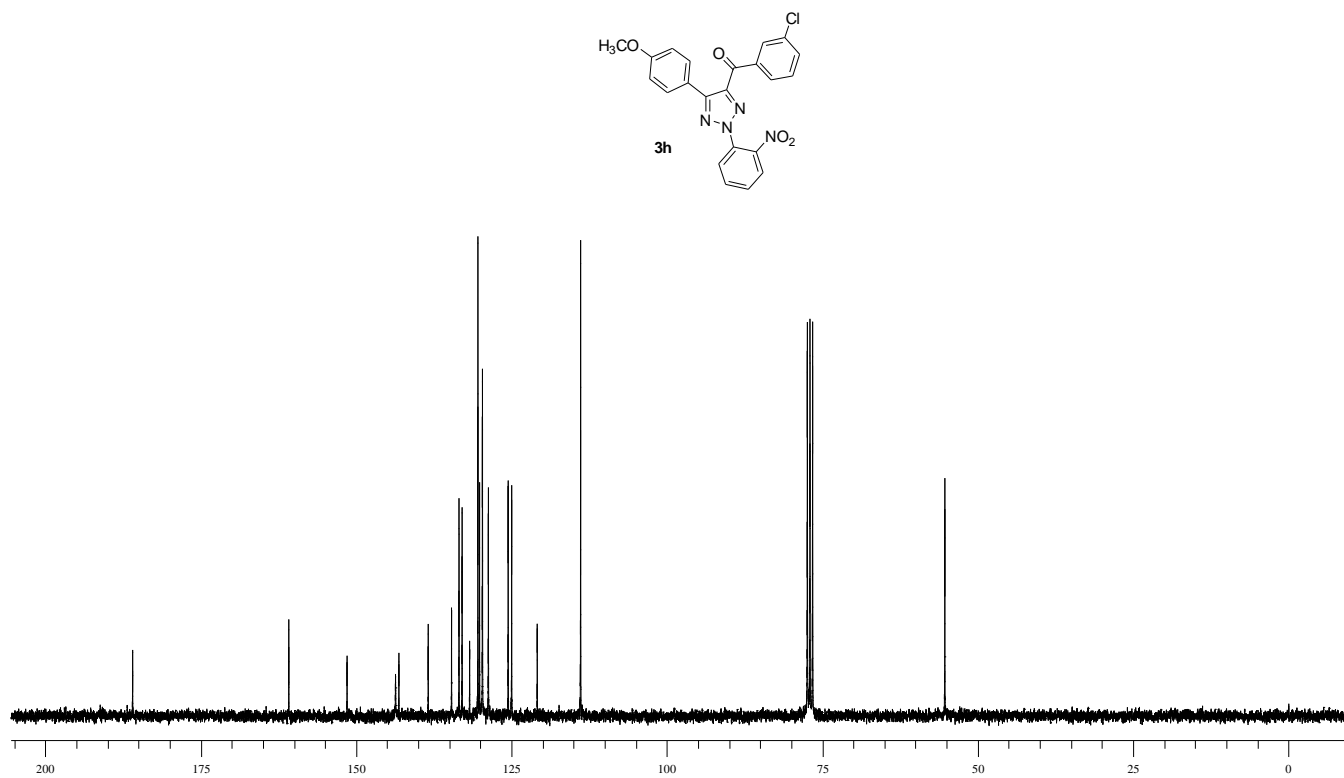

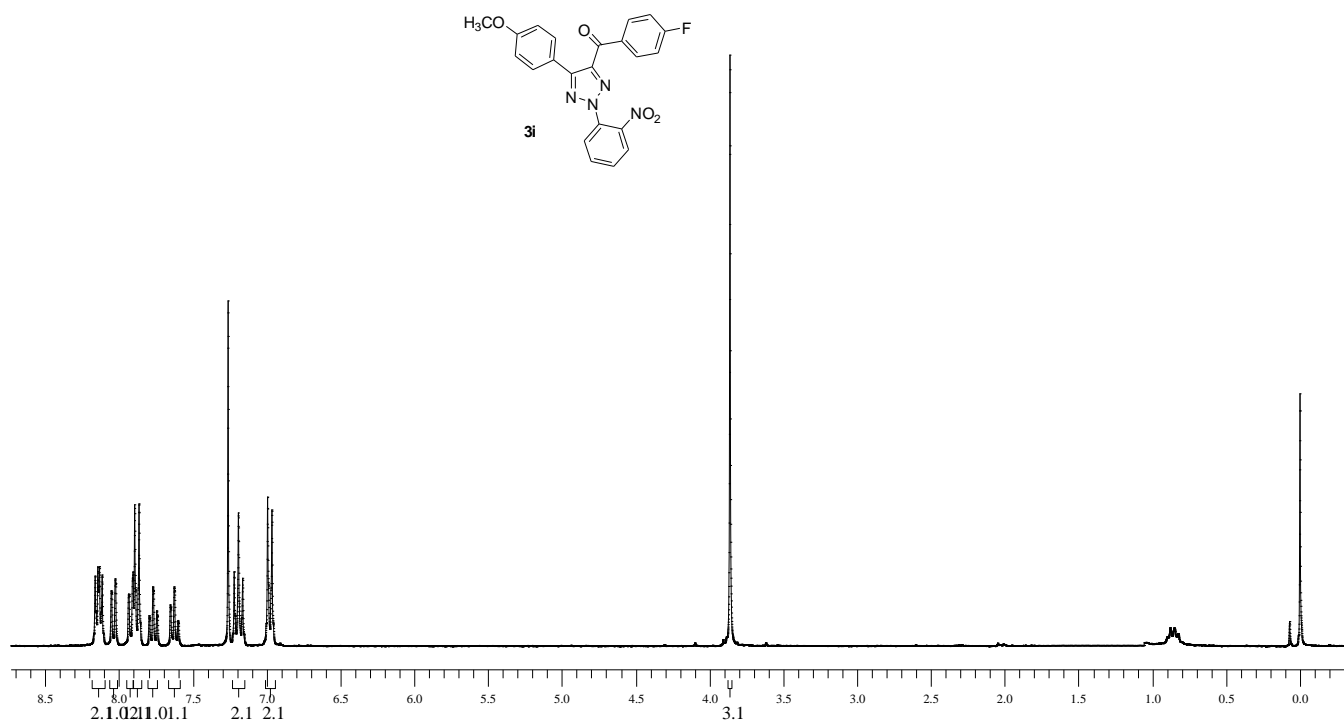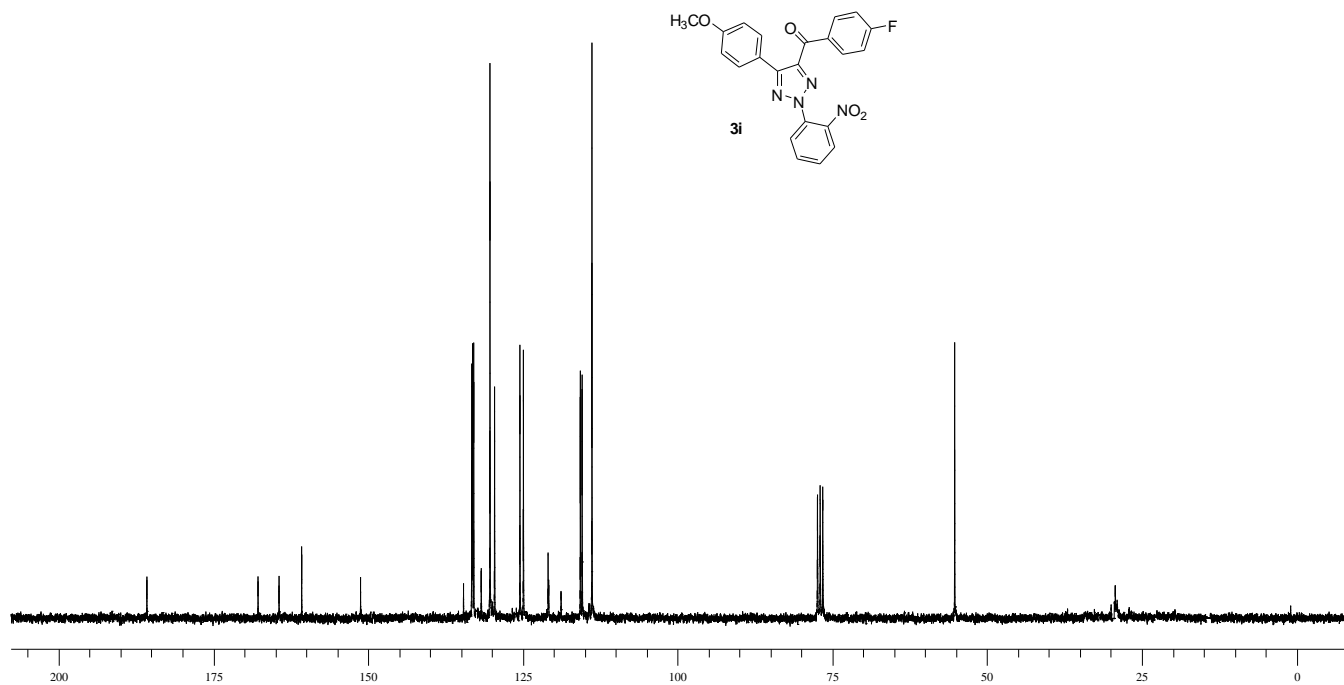

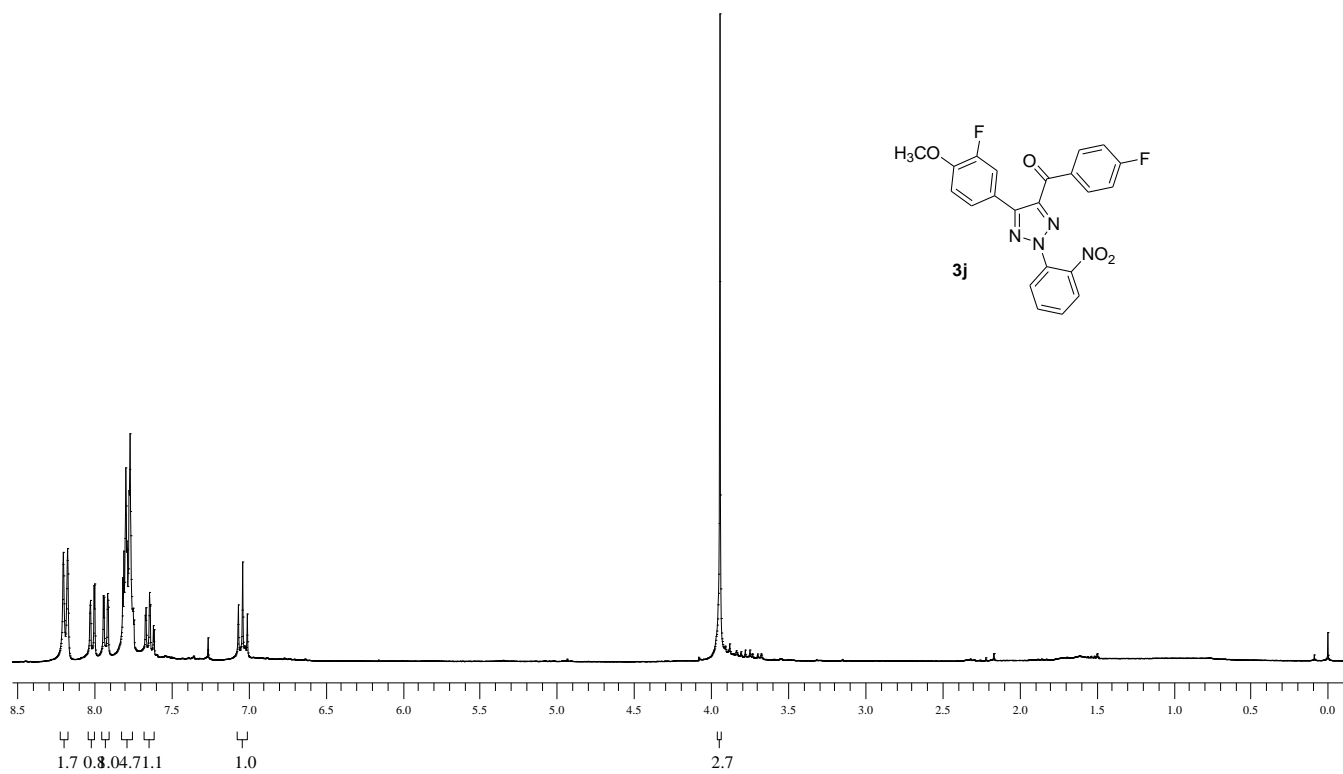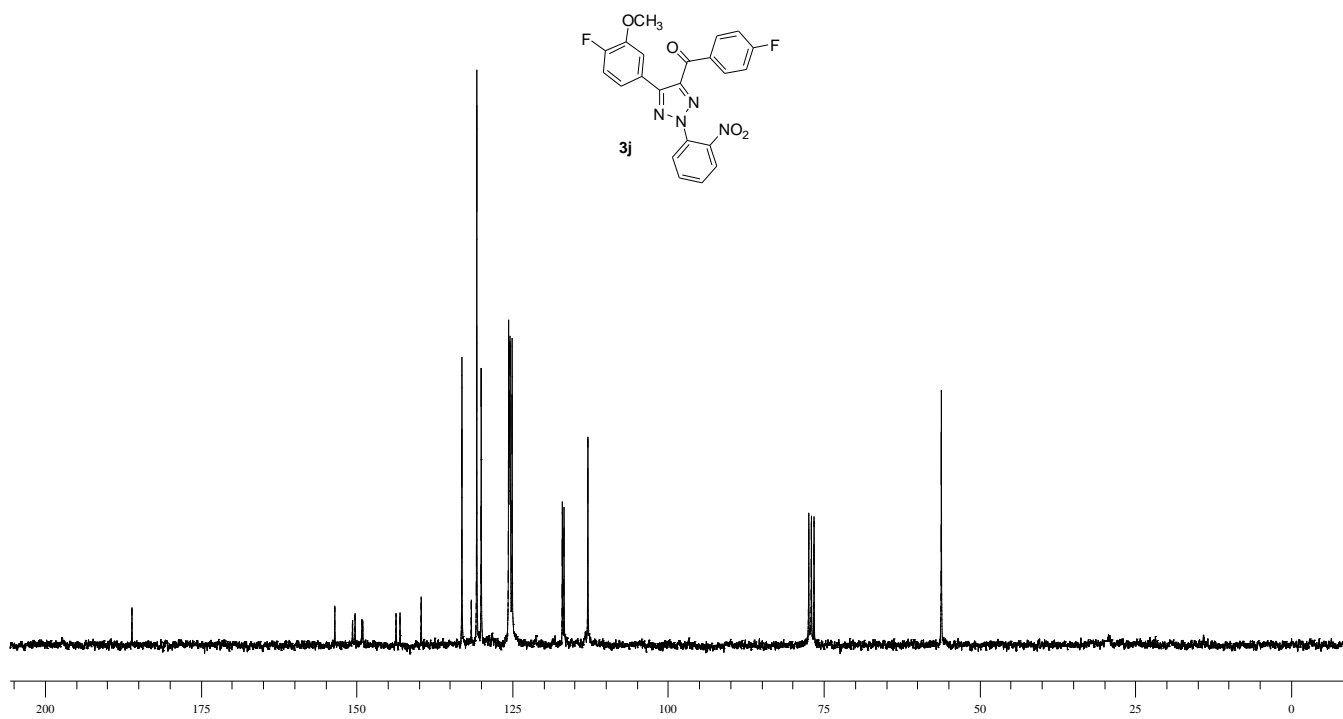

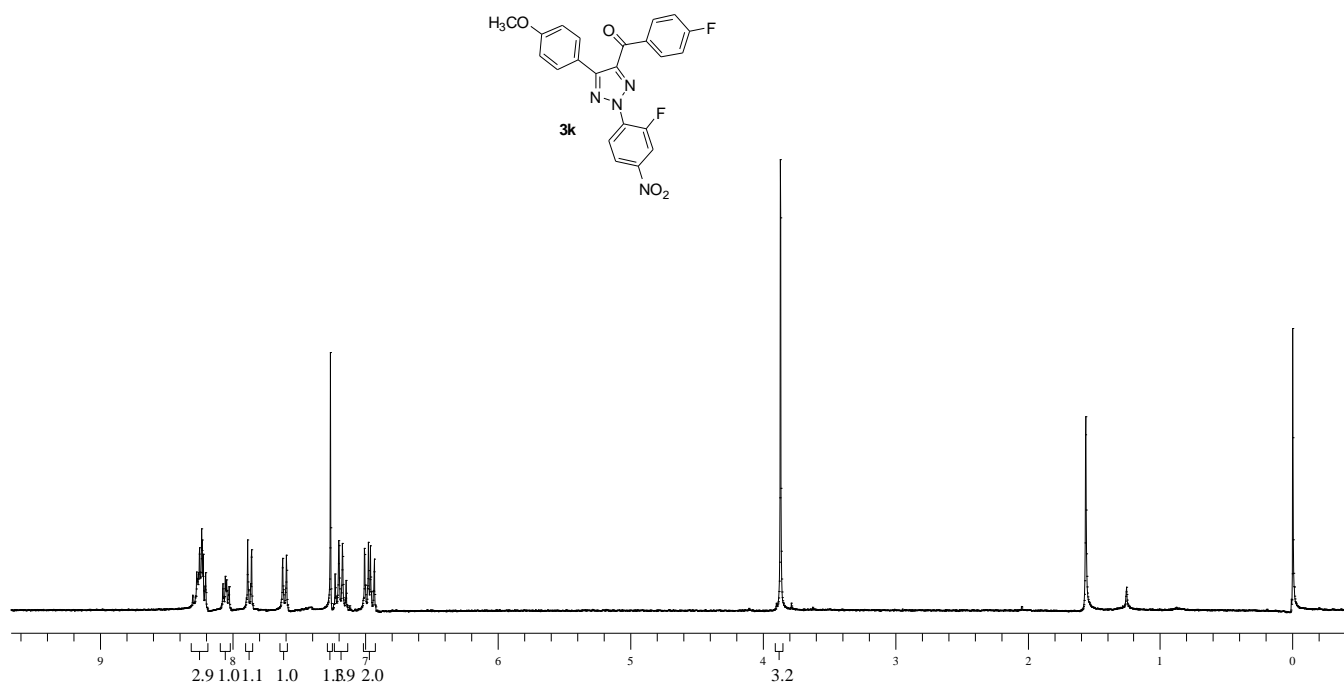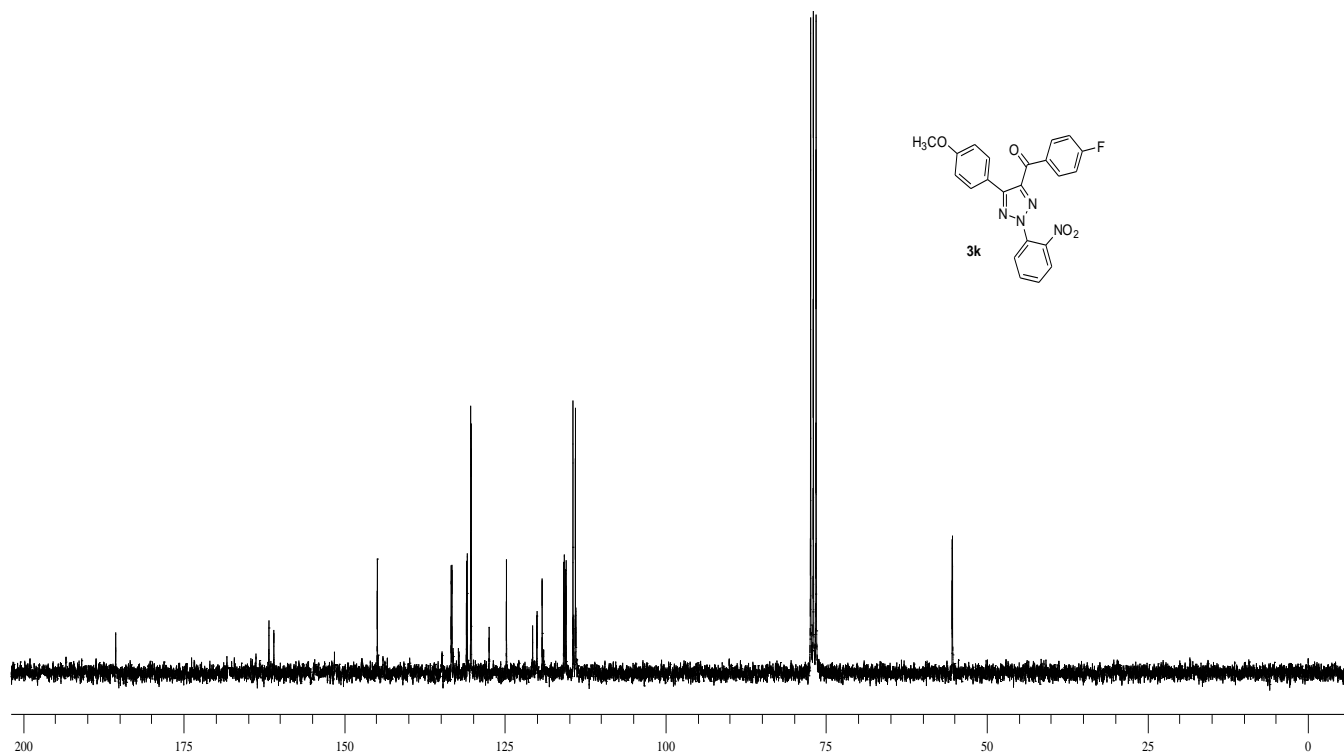

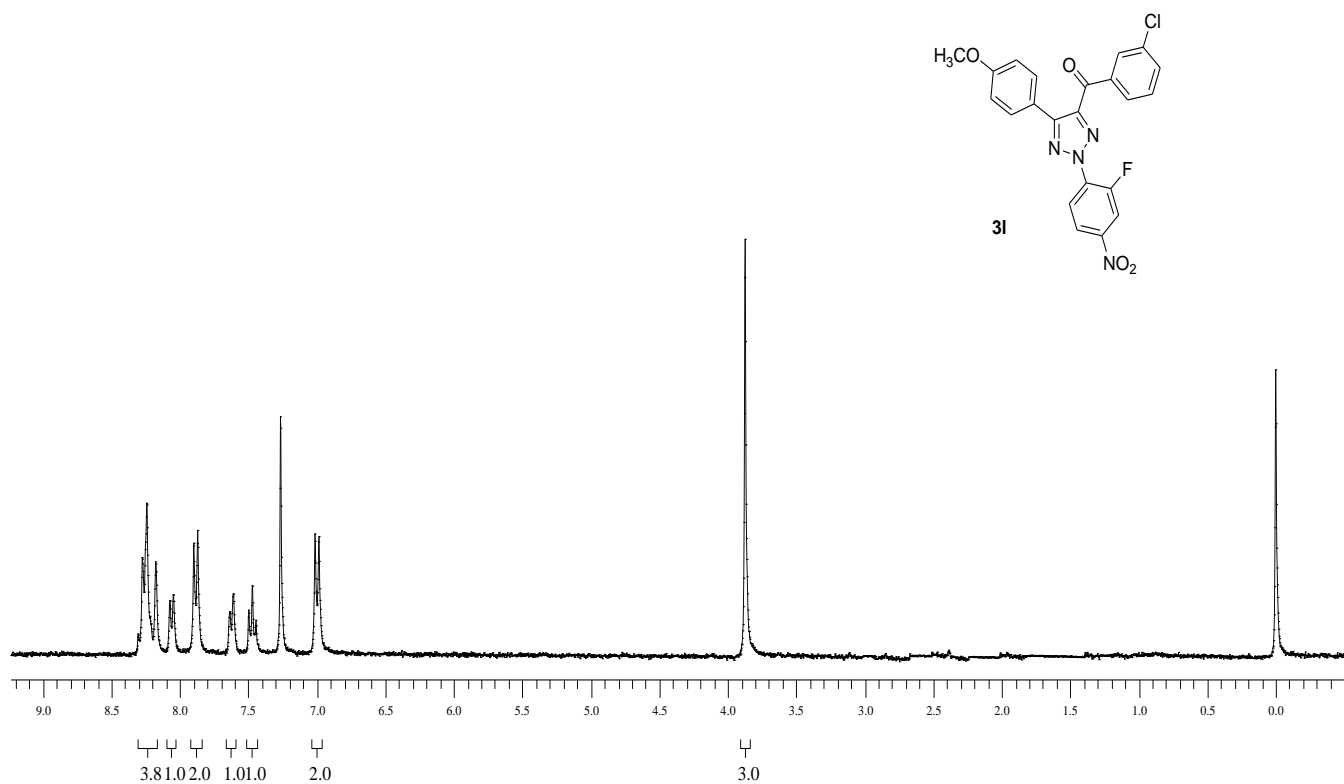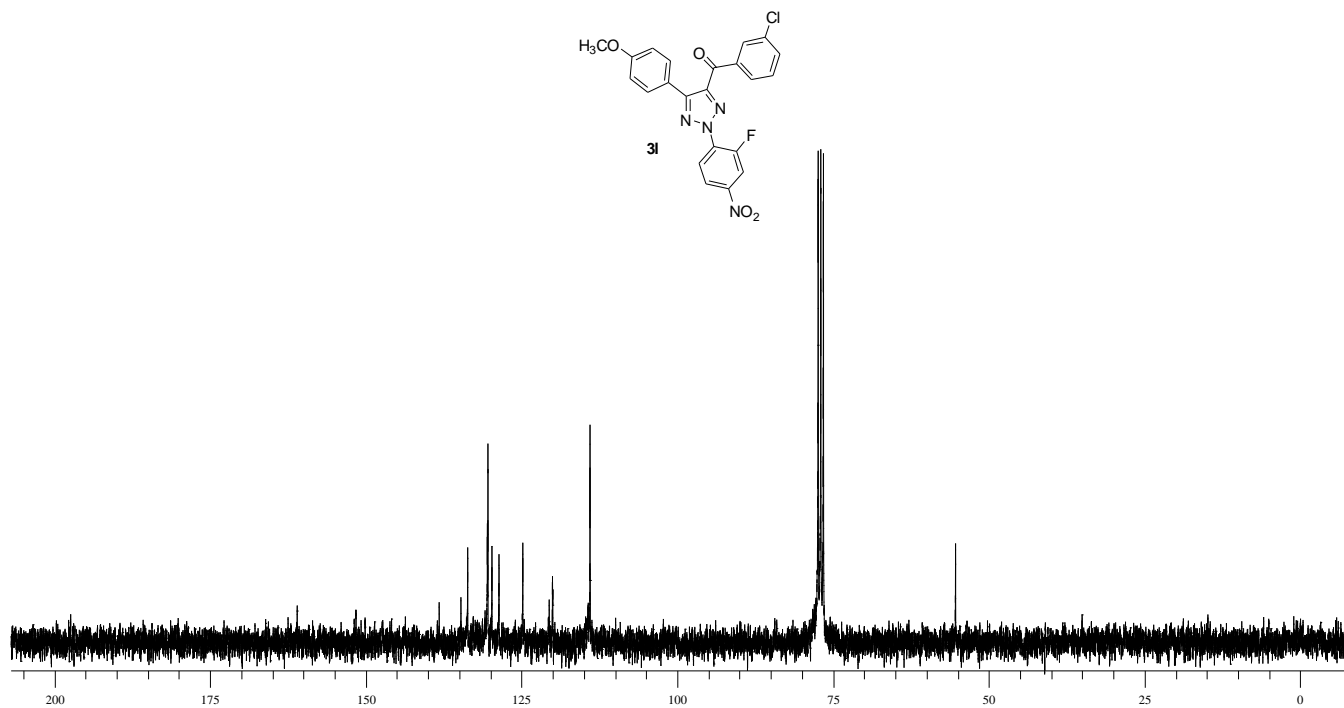

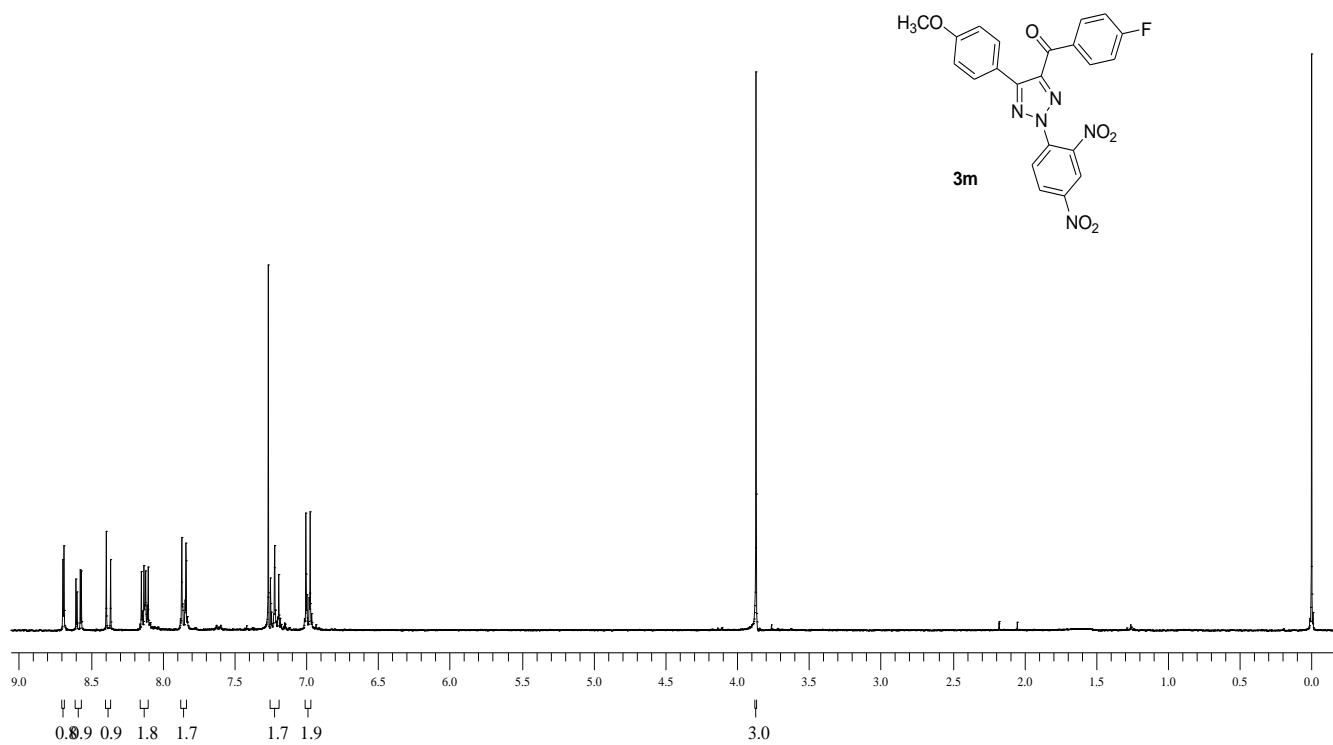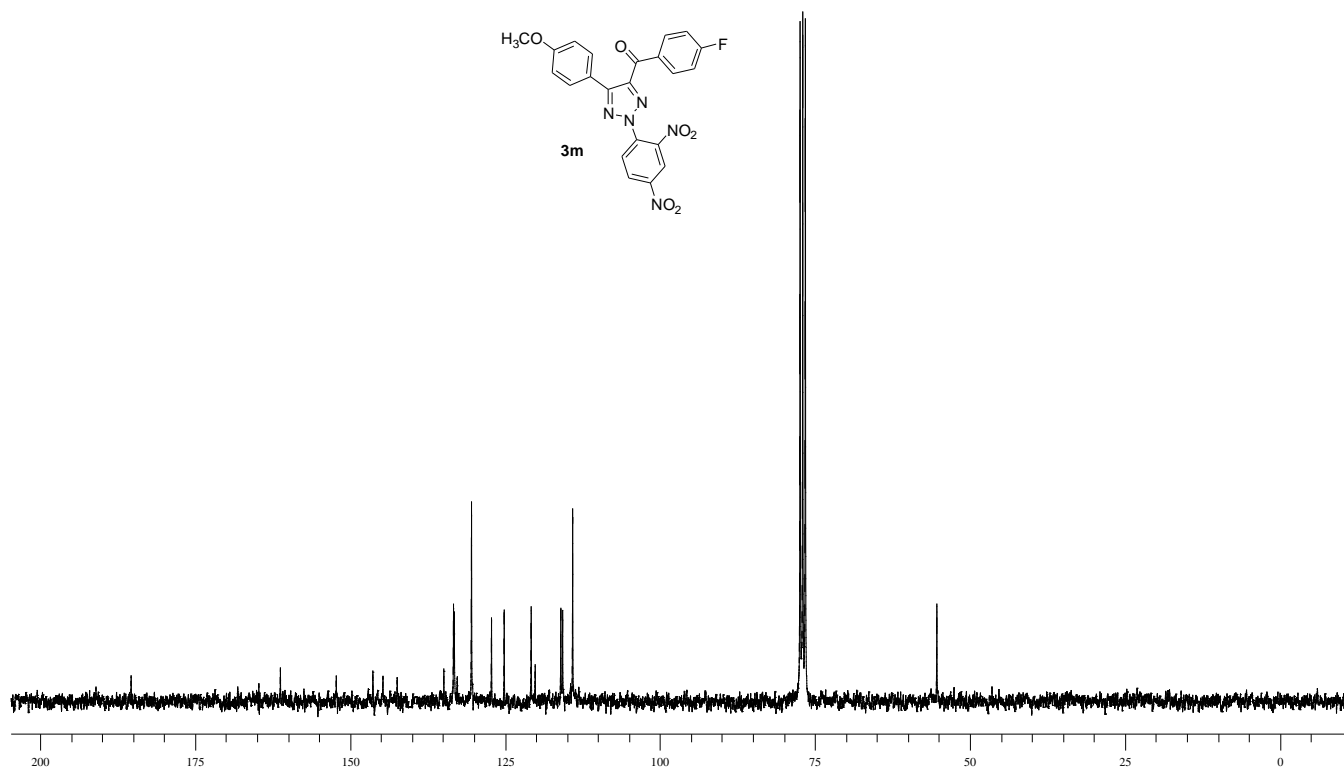

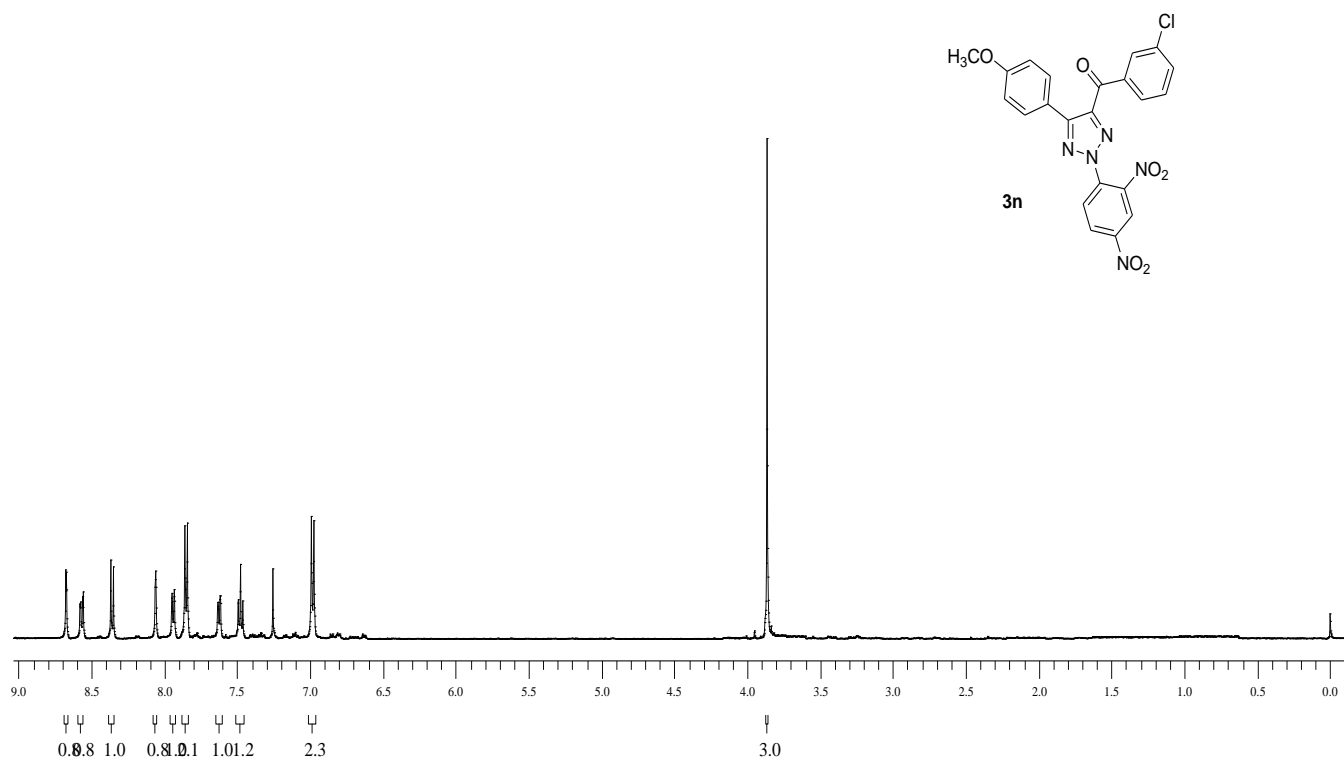

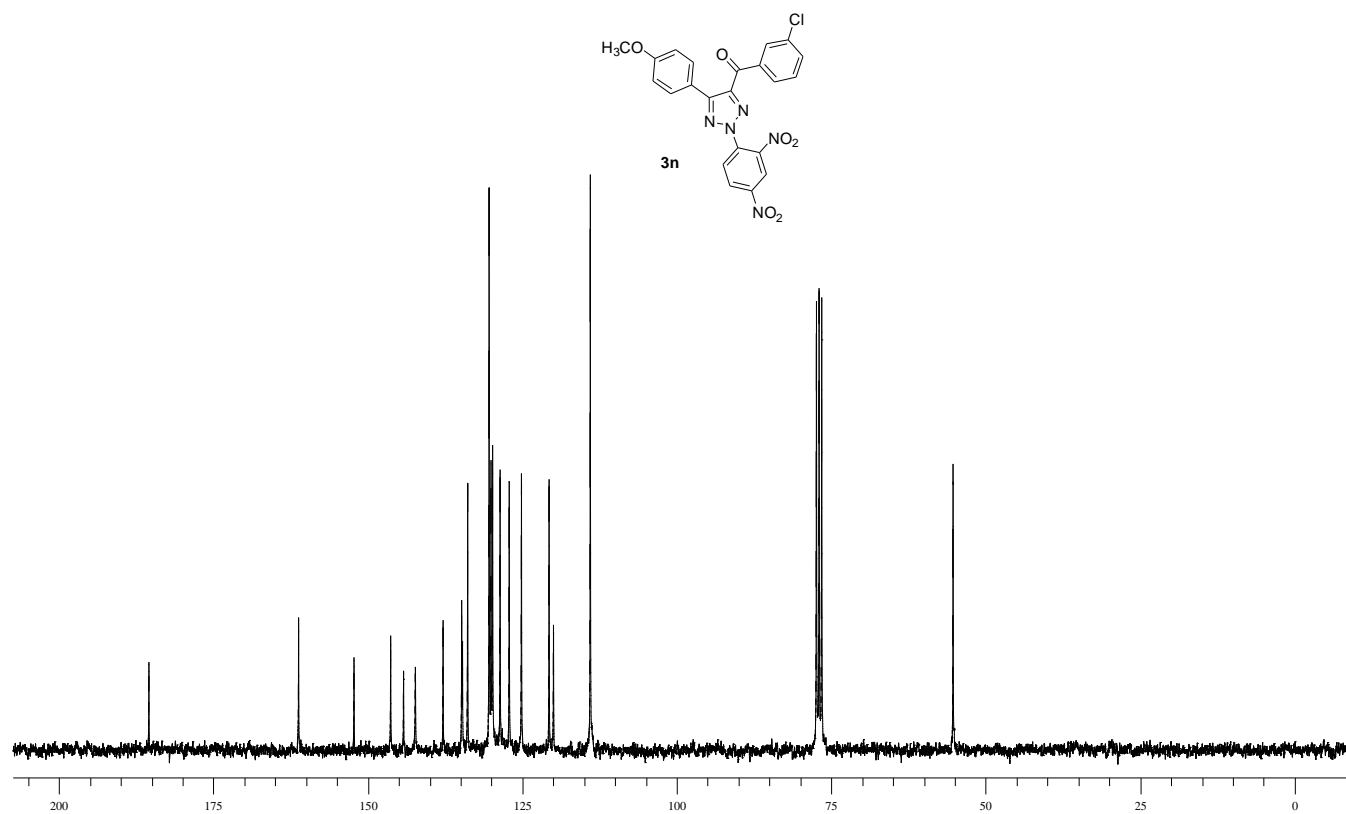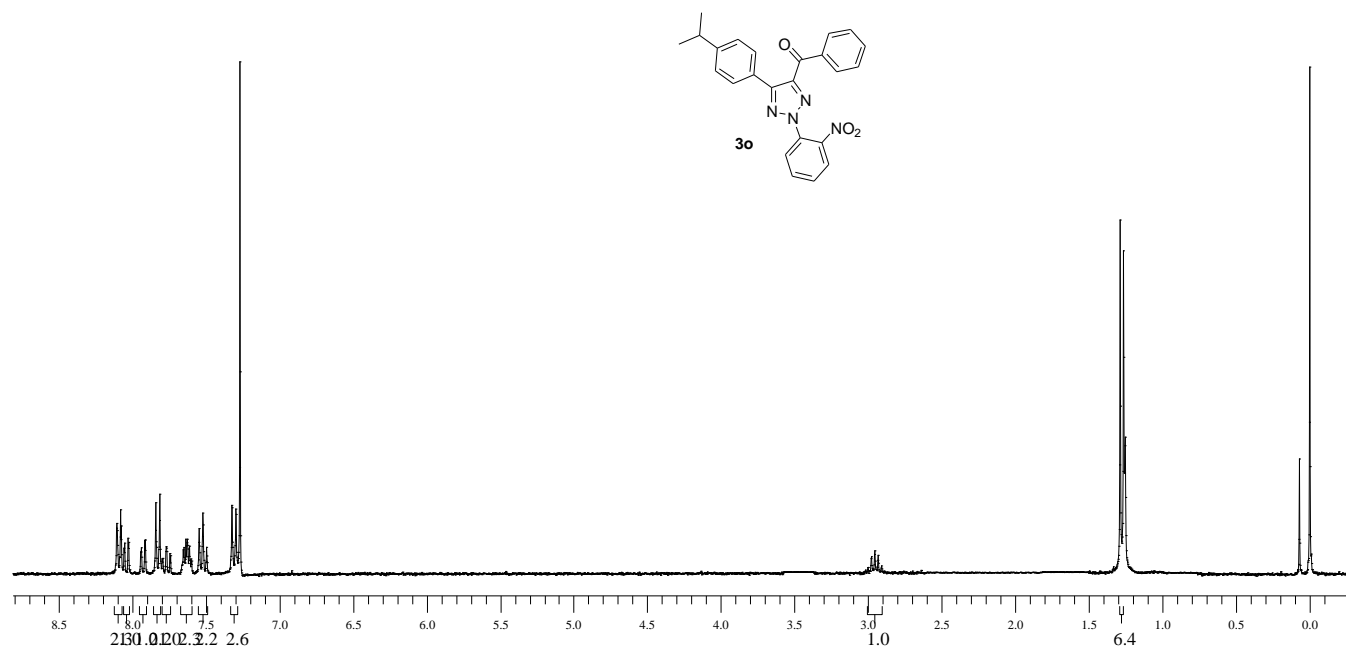



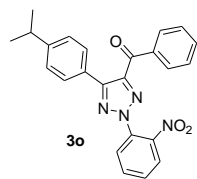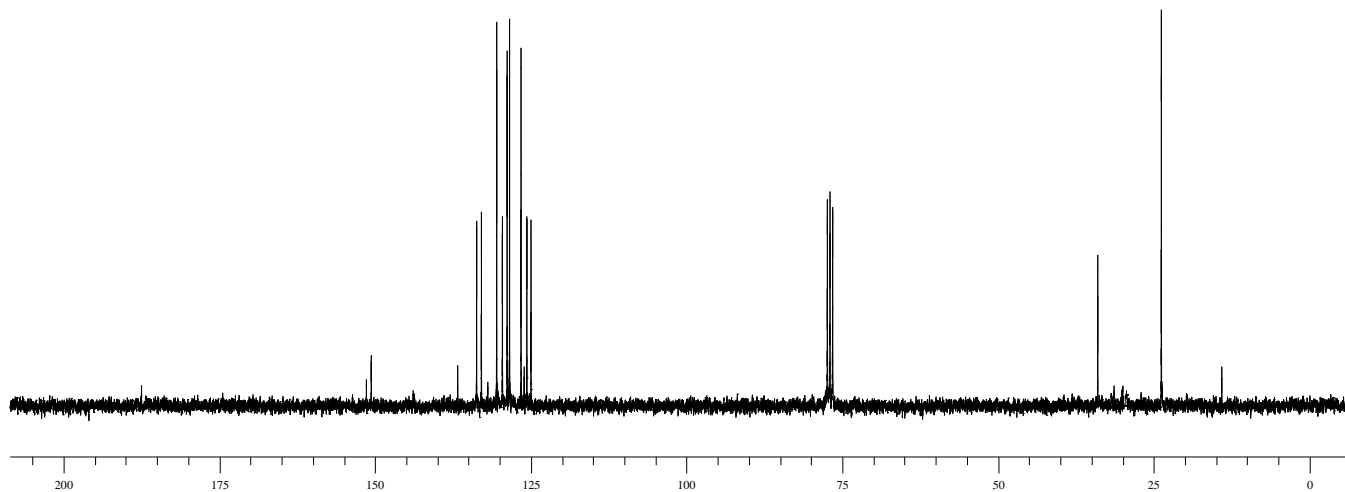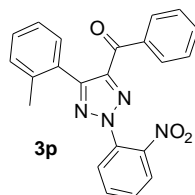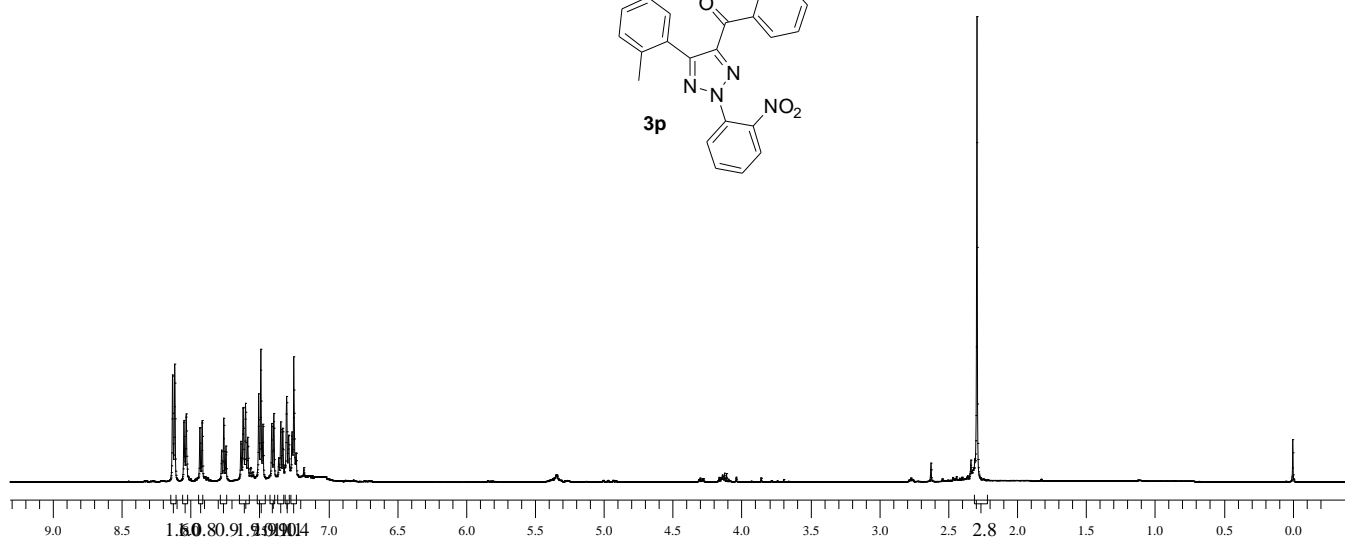

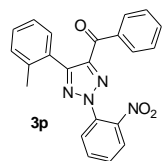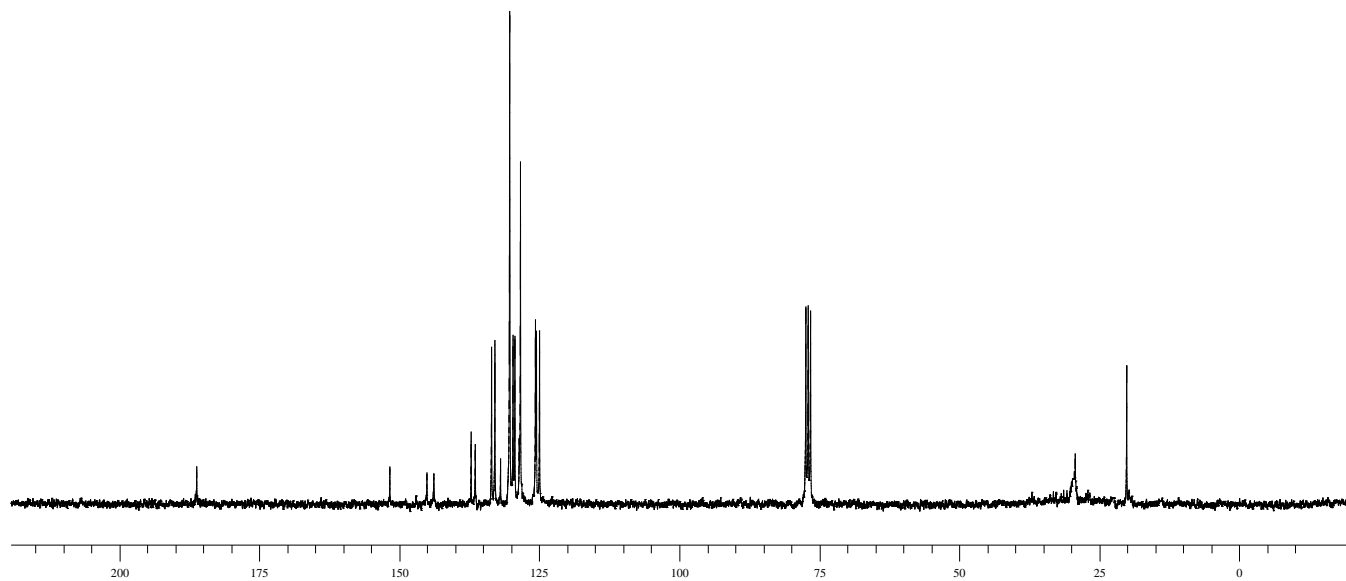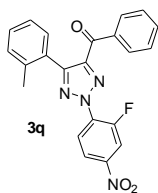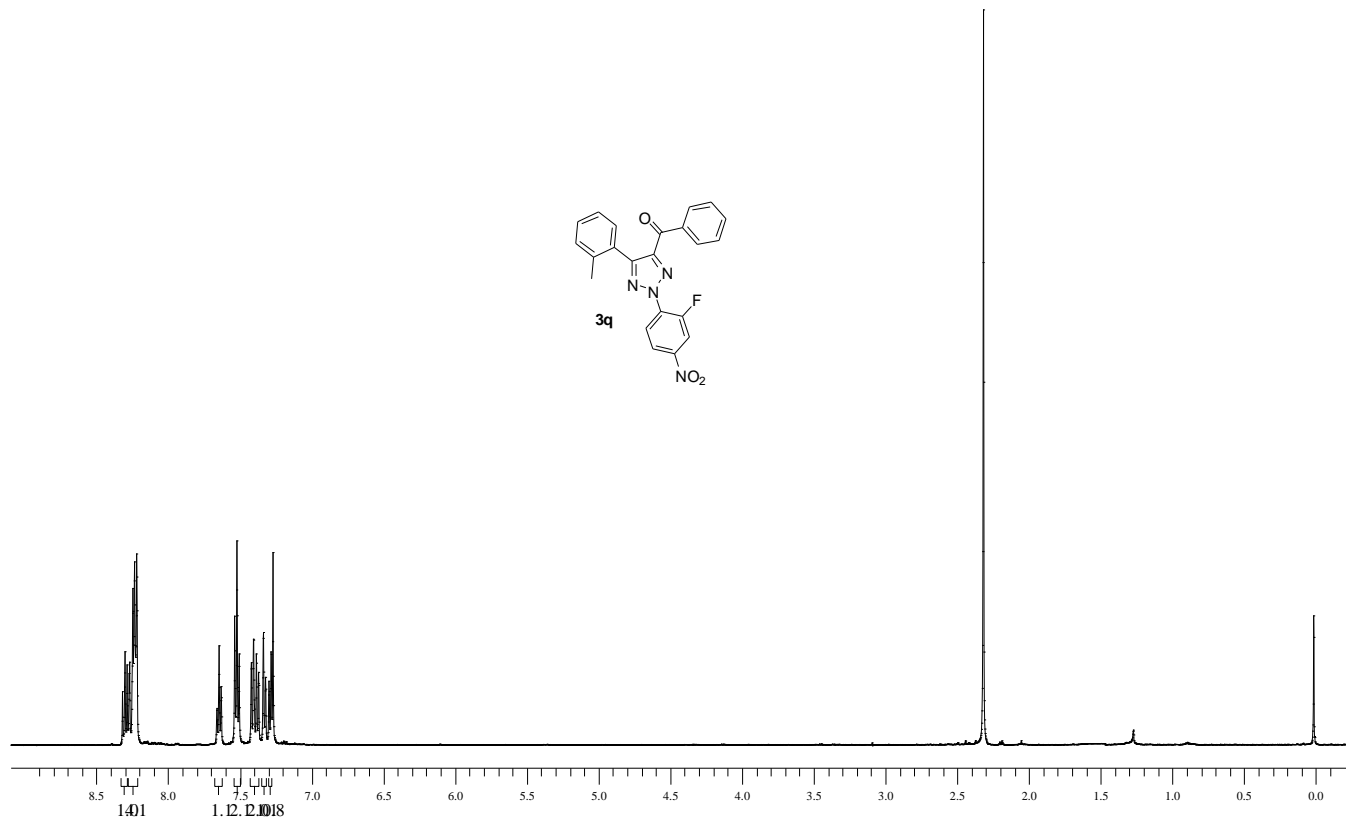

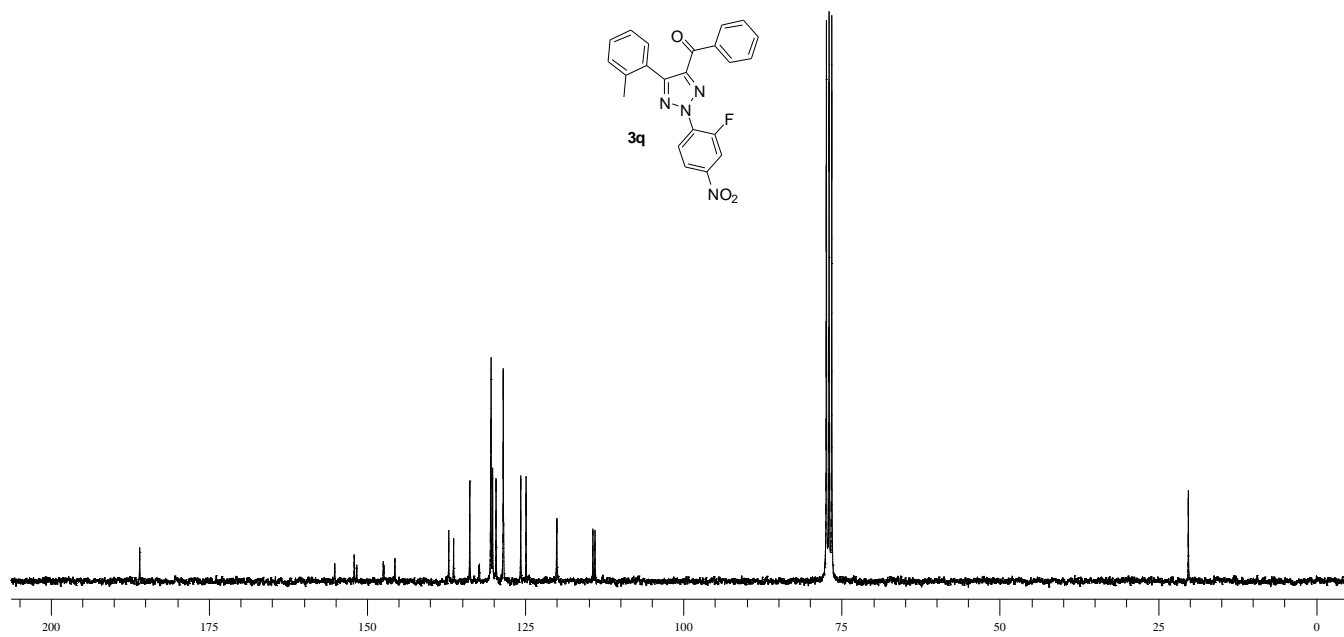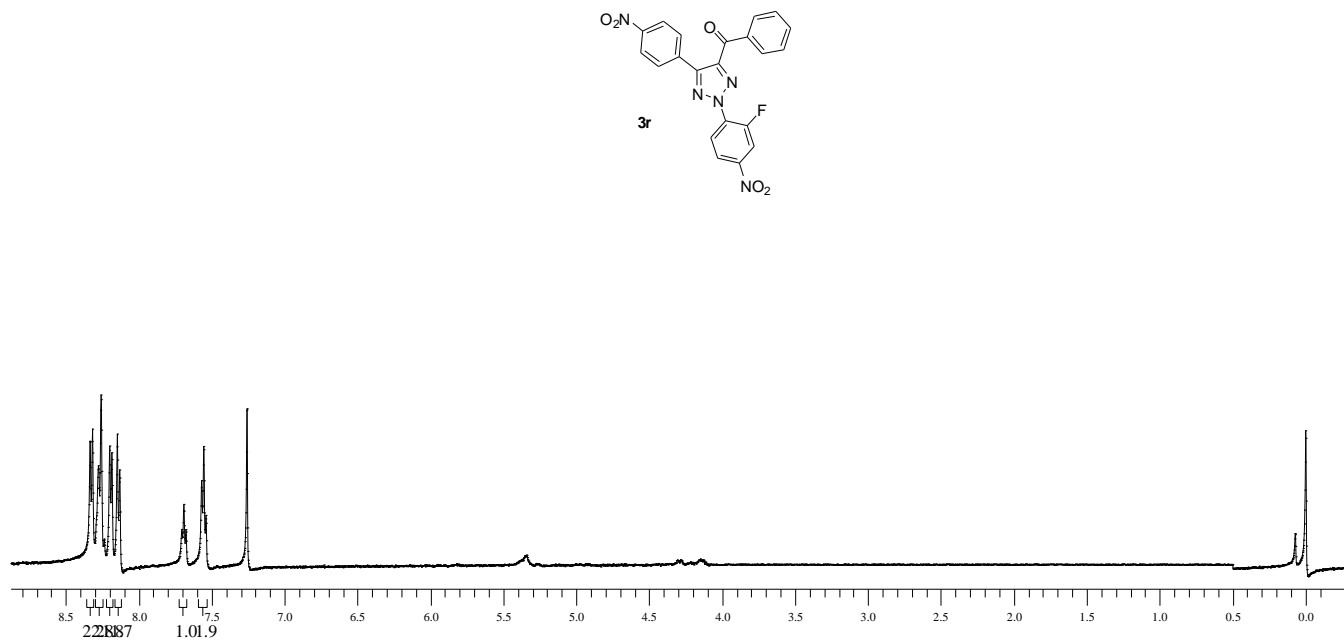

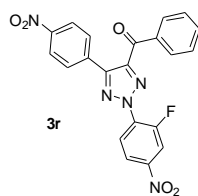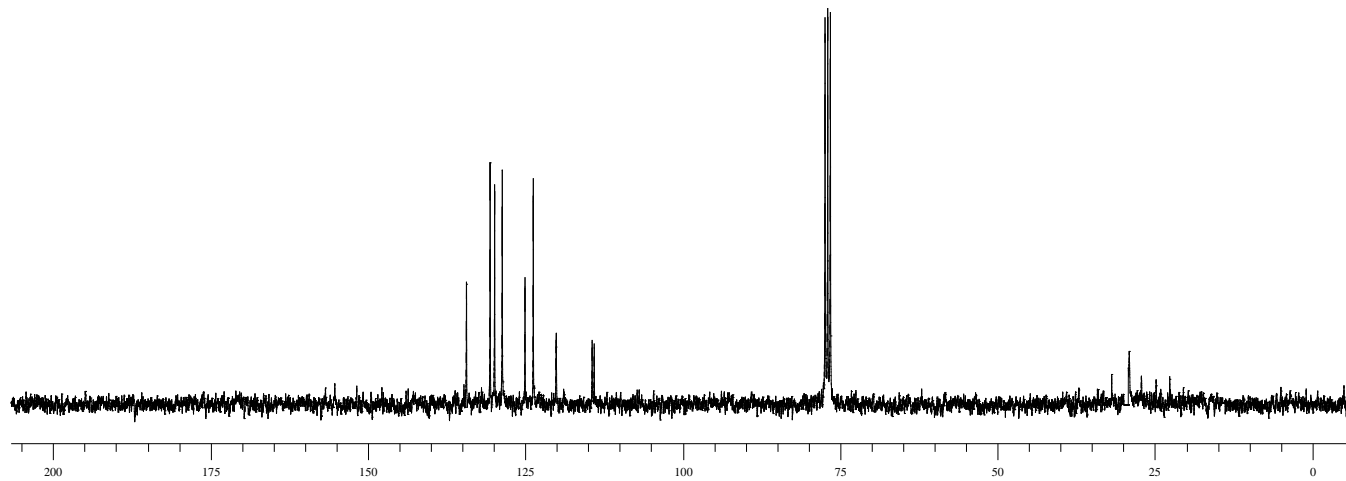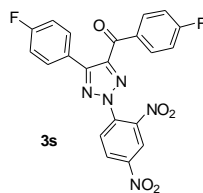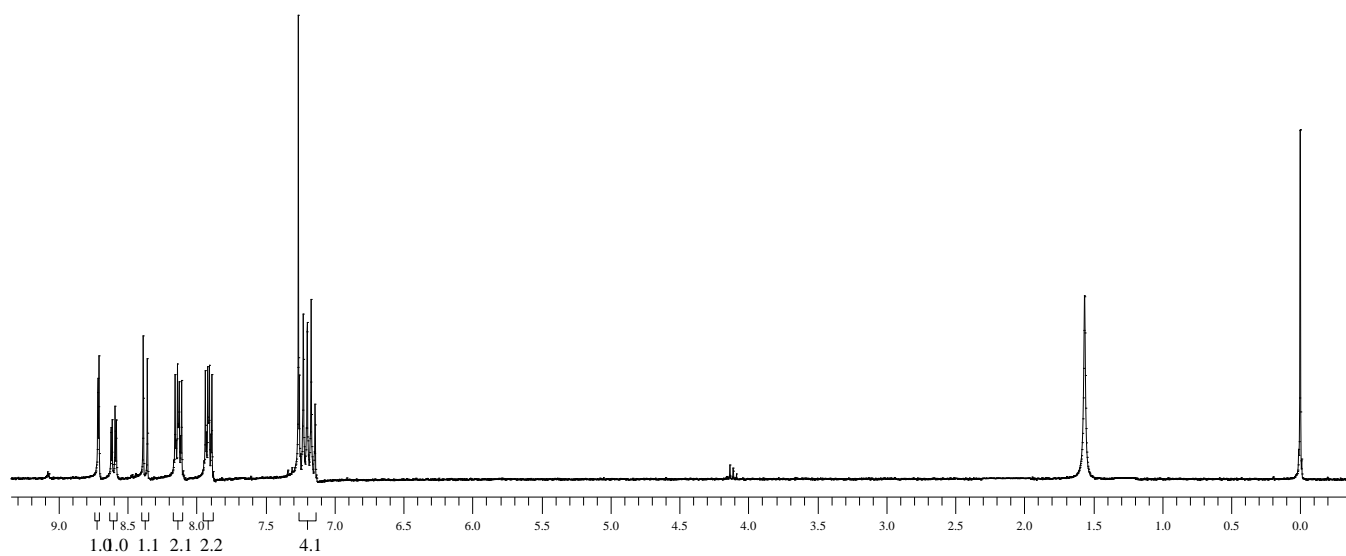

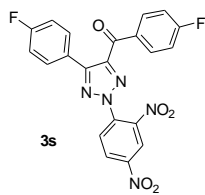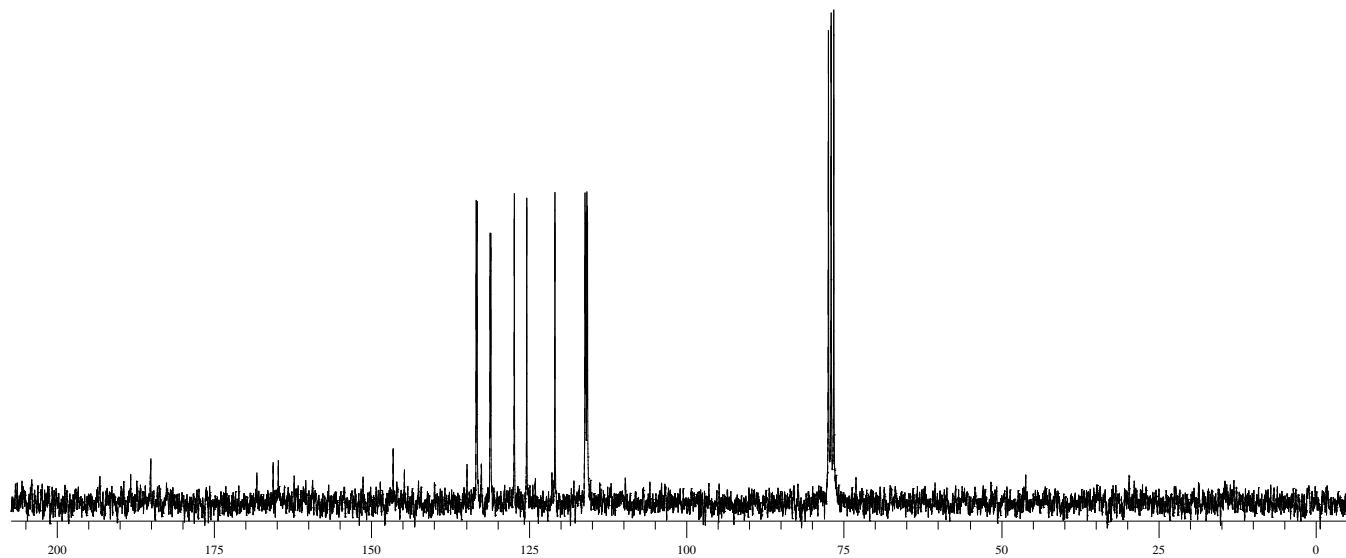

## Powder X-ray diffraction spectra of the Fe<sub>2</sub>O<sub>3</sub> nanoparticles

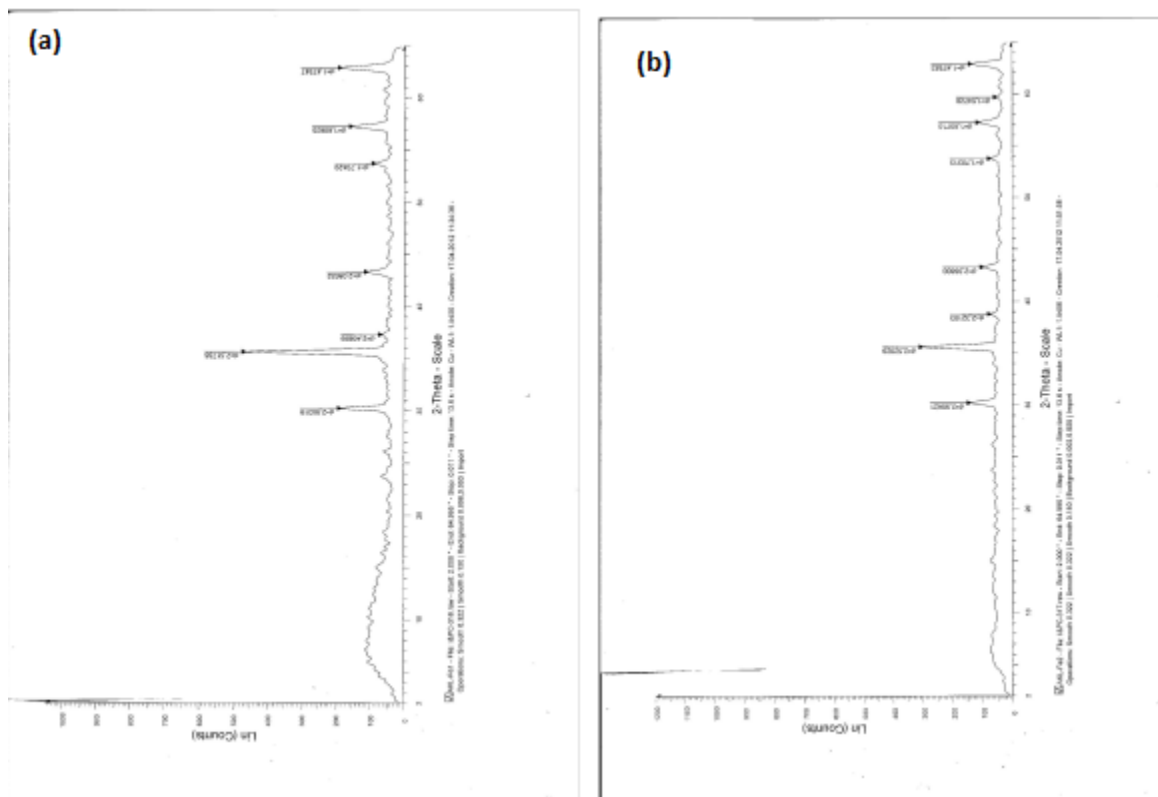

**Figure 1** (a) PXRD of commercial Fe<sub>2</sub>O<sub>3</sub> nanoparticles (b) PXRD of recycled Fe<sub>2</sub>O<sub>3</sub> after three cycles

## SEM-Analysis images:

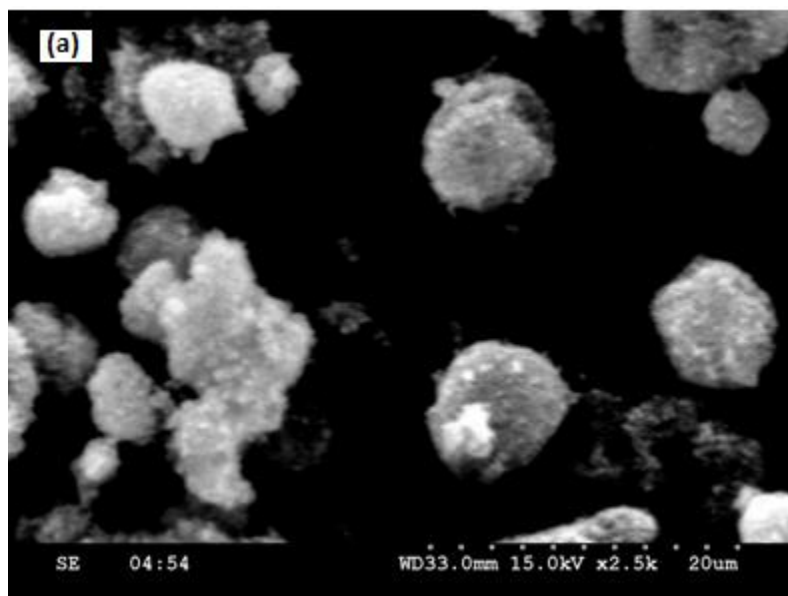

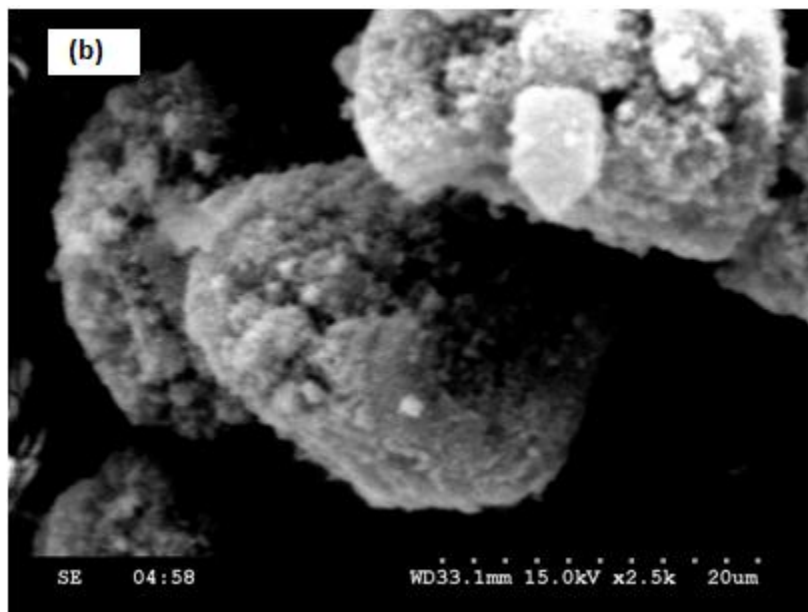

**Figure 2** (a) SEM of commercial  $\text{Fe}_2\text{O}_3$  nanoparticles (b) SEM of recycled  $\text{Fe}_2\text{O}_3$  after three cycles.

### Crystal structure data of the compound 3m

---

|                                   |                                                                                                                                           |
|-----------------------------------|-------------------------------------------------------------------------------------------------------------------------------------------|
| Empirical formula                 | C <sub>22</sub> H <sub>14</sub> F N <sub>5</sub> O <sub>6</sub>                                                                           |
| Formula weight                    | 463.38                                                                                                                                    |
| Temperature                       | 298(2) K                                                                                                                                  |
| Wavelength                        | 0.71073 Å                                                                                                                                 |
| Crystal system, space group       | Triclinic, P-1                                                                                                                            |
| Unit cell dimensions              | a = 7.2369(7) Å    alpha = 116.250(10) deg.<br>b = 12.2218(12) Å    beta = 100.287(8) deg.<br>c = 13.4418(13) Å    gamma = 95.328(8) deg. |
| Volume                            | 1029.07(17) Å <sup>3</sup>                                                                                                                |
| Z, Calculated density             | 2, 1.495 Mg/m <sup>3</sup>                                                                                                                |
| Absorption coefficient            | 0.118 mm <sup>-1</sup>                                                                                                                    |
| F(000)                            | 476                                                                                                                                       |
| Crystal size                      | 0.26 x 0.24 x 0.20 mm                                                                                                                     |
| Theta range for data collection   | 2.92 to 23.53 deg.                                                                                                                        |
| Limiting indices                  | -8 ≤ h ≤ 7, -13 ≤ k ≤ 13, -15 ≤ l ≤ 15                                                                                                    |
| Reflections collected / unique    | 5692 / 3046 [R(int) = 0.0380]                                                                                                             |
| Completeness to theta = 23.53     | 99.8 %                                                                                                                                    |
| Absorption correction             | Empirical                                                                                                                                 |
| Max. and min. transmission        | 0.9768 and 0.9700                                                                                                                         |
| Refinement method                 | Full-matrix least-squares on F <sup>2</sup>                                                                                               |
| Data / restraints / parameters    | 3046 / 0 / 308                                                                                                                            |
| Goodness-of-fit on F <sup>2</sup> | 0.924                                                                                                                                     |
| Final R indices [I > 2σ(I)]       | R1 = 0.0441, wR2 = 0.0698                                                                                                                 |



R indices (all data)  $R_1 = 0.0937$ ,  $wR_2 = 0.0810$

Largest diff. peak and hole 0.138 and  $-0.153 \text{ e.}\text{\AA}^{-3}$

---

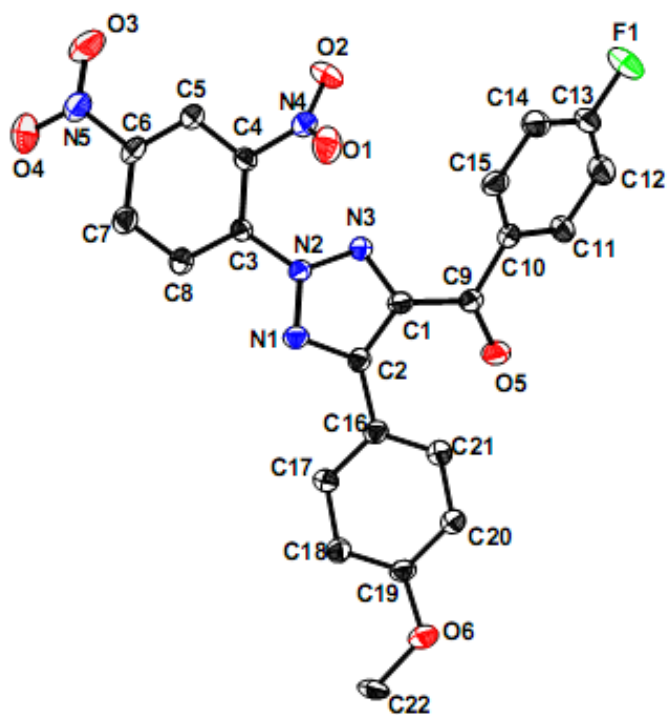

**Figure 2.** Thermal ellipsoidal diagram of compound **3m** (30% probability, Hydrogen atoms are omitted for clarity)
